# Supplementary material for: Does depression increase the risk of stroke in patients with rheumatoid arthritis? A population-based cohort study
Source: PubMed Central journal article supplement — BMJ Open. 2017 Jun 22;7(4):e014233. doi: 10.1136/bmjopen-2016-014233 (PMC5541340; doi:10.1136/bmjopen-2016-014233), 2017-06-22
Supplement: bmjopen-2016-014233.draft_revisions.pdf [file bmjopen-2016-014233.draft_revisions.pdf]

# BMJ Open

## Does depression increase the risk of stroke in patients with rheumatoid arthritis? A population-based cohort study

|                                 |                                                                                                                                                                                                                                                                                                                                                                                                                                                                                                                                                                                                                                                        |
|---------------------------------|--------------------------------------------------------------------------------------------------------------------------------------------------------------------------------------------------------------------------------------------------------------------------------------------------------------------------------------------------------------------------------------------------------------------------------------------------------------------------------------------------------------------------------------------------------------------------------------------------------------------------------------------------------|
| Journal:                        | <i>BMJ Open</i>                                                                                                                                                                                                                                                                                                                                                                                                                                                                                                                                                                                                                                        |
| Manuscript ID                   | bmjopen-2016-014233                                                                                                                                                                                                                                                                                                                                                                                                                                                                                                                                                                                                                                    |
| Article Type:                   | Research                                                                                                                                                                                                                                                                                                                                                                                                                                                                                                                                                                                                                                               |
| Date Submitted by the Author:   | 10-Sep-2016                                                                                                                                                                                                                                                                                                                                                                                                                                                                                                                                                                                                                                            |
| Complete List of Authors:       | Tsai, Tzung-Yi; Buddhist Dalin Tzu Chi General Hospital, Department of Medical Research<br>Lu, Ming-Chi ; Dalin Tzuchi Hospital, The Buddhist Tzuchi Medical Foundation, Division of Allergy, Immunology and Rheumatology<br>Livneh, Hanoch ; Portland State University, Portland, OR 97207-0751, USA<br>Chiu, Shan-Yan ; Dalin Tzuchi Hospital, The Buddhist Tzuchi Medical Foundation, Department of Nursing<br>Lai, Ning-Sheng; Buddhist Dalin Tzu Chi General Hospital, Division of Allergy, Immunology and Rheumatology<br>Guo, How-Ran; National Cheng Kung University, Department of Environmental and Occupational Health, College of Medicine |
| <b>Primary Subject Heading</b>: | Rheumatology                                                                                                                                                                                                                                                                                                                                                                                                                                                                                                                                                                                                                                           |
| Secondary Subject Heading:      | Rheumatology, Mental health, Neurology                                                                                                                                                                                                                                                                                                                                                                                                                                                                                                                                                                                                                 |
| Keywords:                       | rheumatoid arthritis, Depression & mood disorders < PSYCHIATRY, Stroke < NEUROLOGY, cohort study                                                                                                                                                                                                                                                                                                                                                                                                                                                                                                                                                       |
|                                 |                                                                                                                                                                                                                                                                                                                                                                                                                                                                                                                                                                                                                                                        |

SCHOLARONE™  
Manuscripts

only

1  
2  
3 **Does depression increase the risk of stroke in patients with rheumatoid arthritis? A**  
4  
5 **population-based cohort study**  
6  
7

8  
9 Tzung-Yi Tsai<sup>1,2,3</sup>, Ming-Chi Lu<sup>4,5</sup>, Hanoch Livneh<sup>6</sup>, Shan-Yan Chiu<sup>7</sup>, Ning-Sheng Lai<sup>4,5</sup>,  
10  
11 How-Ran Guo<sup>2,8,9\*</sup>  
12  
13

14  
15  
16  
17 <sup>1</sup> Department of Medical Research, Dalin Tzuchi Hospital, The Buddhist Tzuchi Medical  
18 Foundation, 2 Minsheng Road, Dalin Township, Chiayi 62247, Taiwan  
19

20  
21 <sup>2</sup> Department of Environmental and Occupational Health, College of Medicine, National  
22 Cheng Kung University, 138 Sheng-Li Road, Tainan 70428, Taiwan  
23

24  
25  
26 <sup>3</sup> Department of Nursing, Tzu Chi University of Science and Technology, 880 Chien-Kuo  
27 Road Section 2, Hualien 62247, Taiwan  
28

29  
30 <sup>4</sup> Division of Allergy, Immunology and Rheumatology, Dalin Tzuchi Hospital, The Buddhist  
31 Tzuchi Medical Foundation, 2 Minsheng Road, Dalin Township, Chiayi 62247, Taiwan  
32

33  
34  
35 <sup>5</sup> School of Medicine, Tzu Chi University, 701 Jhongyang Road Section 3, Hualien 97004,  
36 Taiwan  
37

38  
39 <sup>6</sup> Rehabilitation Counseling Program, Portland State University, Portland, OR 97207-0751,  
40 USA  
41

42  
43  
44 <sup>7</sup> Department of Nursing, Dalin Tzuchi Hospital, The Buddhist Tzuchi Medical Foundation, 2  
45 Minsheng Road, Dalin Township, Chiayi 62247, Taiwan  
46

47  
48 <sup>8</sup> Department of Occupational and Environmental Medicine, National Cheng Kung University  
49 Hospital, 138 Sheng-Li Road, Tainan 70428, Taiwan  
50

51  
52  
53 <sup>9</sup> Occupational Safety, Health, and Medicine Research Center, National Cheng Kung  
54 University, 138 Sheng-Li Road, Tainan 70428, Taiwan  
55

1  
2  
3  
4 Correspondence and requests for materials should be addressed to Guo HR.  
5  
6

7 Email: dm732024@tzuchi.com.tw  
8

9 TEL: 886-5-2648000 ext. 3209  
10

11 FAX: 886-5-2648000 ext. 3241  
12  
13  
14  
15  
16  
17  
18  
19  
20  
21  
22  
23  
24  
25  
26  
27  
28  
29  
30  
31  
32  
33  
34  
35  
36  
37  
38  
39  
40  
41  
42  
43  
44  
45  
46  
47  
48  
49  
50  
51  
52  
53  
54  
55  
56  
57  
58  
59  
60

For peer review only

**ABSTRACT**

**Objectives:** Comorbid depression is common and undertreated in patients with rheumatoid arthritis (RA). It remains uncertain whether comorbid depression provoked the risk of poor clinical outcome, stroke in particular, among RA patients. This work aimed to determine if depression onset during the treatment process increases stroke risk for patients with RA as compared to those with (a) neither RA nor depression, (b) RA only, and (c) depression only.

**Design:** A nationwide, population-based cohort study.

**Setting:** Taiwan's Longitudinal Health Insurance Database.

**Participants:** We identified 8,045 subjects with a newly diagnosed RA between 1997 and 2010, together with 32,600 subjects without RA matched by age, gender and index date. All subjects were further divided into four groups based on whether they were diagnosed with comorbid depression during the follow-up period.

**Main outcome measure:** The incidence rate and hazard ratio for incident stroke were estimated by the end of 2012 using Cox proportional-hazard regression.

**Results:** We discovered that RA patients with the comorbid depression exhibited the highest risk of stroke, with an adjusted hazard ratios (HRs) of 2.18 (95% confidence interval = 1.87-2.54). Those with RA only or those with depression only still had the higher risk of stroke by 43% and 57% as compared with subjects without either condition. Multivariate analysis showed RA subjects who were male or older, incurred the onset of depression, or had comorbidities such as hypertension, diabetes as well as heart disease had a greater risk of stroke.

**Conclusions:** This study cleared up the significant association between RA and the subsequent risk of stroke, and further highlighted that the onset of depression within the treatment process may increase stroke risk for RA subjects. Findings could assist healthcare providers to pinpoint RA individuals with a higher predisposition of stroke, which could



1  
2  
3 facilitate the provision of appropriate rehabilitation.  
4

5 **Keywords** : rheumatoid arthritis, depression, stroke, cohort study  
6  
7  
8  
9  
10

### 11 **Strengths and limitations of this study**

- 14 ● The main outcome measures employed in this work are validated due to the application  
15 of population-based cohort study, based on a nationwide claim database, thus decreasing  
16 recall and selection bias.  
17  
18
- 20 ● This is the first report to clarify the effect of comorbid depression on the stroke risk  
21 among RA subjects, which was beneficial for healthcare providers in guiding more  
22 effective treatment strategies to improve the clinical outcomes for them.  
23  
24
- 26 ● Misclassification of diseases may occur when using an administrative database.  
27  
28  
29  
30  
31  
32  
33  
34  
35  
36  
37  
38  
39  
40  
41  
42  
43  
44  
45  
46  
47  
48  
49  
50  
51  
52  
53  
54  
55  
56  
57  
58  
59  
60

## INTRODUCTION

Rheumatoid arthritis (RA) is a systemic autoimmune disease manifested as long-term joint damage, chronic debilitating pain, and premature mortality. This disease often affects people 30 to 50 years of age and results in disability and inability to work, thus posing a heavy burden on patients with RA, their families and the healthcare system.<sup>1</sup> A review of the financial burdens of RA in the United States showed that the annual direct medical costs of RA reached about \$9 billion, and the total societal costs (the sum of direct and indirect costs) was estimated to exceed \$39 billion.<sup>2</sup>

Despite improvements in the diagnosis and treatment of RA, patients with RA still have a lower life expectancy (6-7 years) when compared with the general population.<sup>3</sup> This increased mortality is due primarily to cardiovascular diseases such as myocardial infarction (MI) or stroke.<sup>4-6</sup> Nevertheless, unlike the studies of RA predicting the onset of MI,<sup>4 7 8</sup> evidence for an association between RA and the development of stroke remains conflicting. A meta-analysis of 15 articles indicated that individuals with RA had a 63% higher risk for MI, but not for stroke [odds ratio (OR)= 1.14, 95% confidence interval(CI) = 0.86-1.51] when compared to the general population.<sup>4</sup> On the other hand, a recent Danish study involving 18,247 patients with RA, who were followed for a median of 4.8 years, indicated that those with RA had a 30% higher risk of stroke than a non-RA group.<sup>9</sup> Another meta-analysis of 17 studies reported that patients with RA had a higher predisposition to develop stroke than did non-RA subjects, with a pool risk of 1.91.<sup>8</sup>

One cause for concern is that the former studies did not consider the effect of accompanying psychological factors on the risk of stroke; depression, in particular, which is often underdiagnosed and undertreated.<sup>10</sup> Depression, a well-documented comorbidity among people with chronic diseases, including arthritis, may exacerbate functional disabilities, affect adherence to treatment, and be a barrier to self-care and self-management behaviors.<sup>11</sup> A

1  
2  
3 recent meta-analysis estimated that the prevalence of depression among patients with RA  
4 ranges from 14.8 to 38.8%,<sup>12</sup> and findings from our previous study indicated that RA patients  
5 were nearly twice as likely to experience depression as the general population.<sup>13</sup> Indeed, once  
6 patients with RA suffered from concomitant depression, they had a 7.2% increase in medical  
7 costs (\$12,225 vs. \$11,404),<sup>14</sup> and their likelihood of mortality more than doubled.<sup>11</sup>  
8  
9 Therefore, information as to whether symptoms of depression increase the risk of stroke in  
10 patients with RA would be of utmost importance in laying the groundwork for the  
11 implementation of more effective therapeutic interventions to achieve more favorable  
12 prognoses, thus serving to extend the life expectancy of patients with RA.  
13  
14

15  
16  
17  
18  
19  
20  
21  
22  
23 Given the alarming rate of depression in patients with RA, and the link between depression  
24 and increased cardiovascular events, it becomes imperative to investigate if comorbid  
25 depression is related to poor clinical outcomes, stroke in particular, among RA patients.  
26  
27 However, to date, no clinical observations or empirical data have documented this concern,  
28 and evidence from prospective studies is still lacking. The aim of this cohort study, therefore,  
29 was to determine if RA patients with the comorbid depression were at an increased risk for  
30 stroke as compared to those with (a) neither RA nor depression, (b) RA only, and (c)  
31 depression only, using claims data from the National Health Insurance (NHI) of Taiwan.  
32  
33  
34  
35  
36  
37  
38  
39  
40  
41

## 42 **METHODS**

### 43 **Data sources**

44  
45  
46  
47 The data analyzed in this cohort study were retrieved from the Longitudinal Health Insurance  
48 Database (LHID), maintained by the Bureau of NHI (BNHI) and provided to scientists in  
49 Taiwan for research purposes. Taiwan launched a single-payer NHI Program in 1995 in order  
50 to remove financial barriers to medical care for all legal residents. At the end of 2010, more  
51 than 99% of Taiwan's population had enrolled in this program.<sup>15</sup> The LHID is a subset of the  
52  
53  
54  
55  
56  
57  
58  
59  
60

1  
2  
3 NHI database, and contains comprehensive utilization and enrollment information for one  
4  
5 million randomly selected NHI beneficiaries, representing 5% of all enrollees in Taiwan in  
6  
7 2000. Because a multistage stratified systematic sampling method was used for this study,  
8  
9 there were no statistically significant differences regarding gender or age between the  
10  
11 sampled group and the total number of enrollees.<sup>15</sup> This study complied with the guidelines  
12  
13 of the Declaration of Helsinki and was approved by the local institutional review board and  
14  
15 ethics committee of Buddhist Dalin Tzu Chi Hospital, Taiwan (No. B10004021-1). As the  
16  
17 LHID data files contained only de-identified secondary data, the need for informed consent  
18  
19 from individual patient consent was waived by the institutional review board.  
20  
21  
22  
23  
24

### 25 **Study subjects**

26  
27 Diagnoses in the insurance claims data were coded according to the International  
28  
29 Classification of Disease, 9th Revision, Clinical Modification (ICD-9-CM). The LHID  
30  
31 records were used to identify patients with RA in the age bracket 20-to-90 years of age, and  
32  
33 newly diagnosed patients between 1997 and 2010. Those who were diagnosed with an  
34  
35 ICD-9-CM code of 714.0 comprised the RA cohort. To improve the diagnostic accuracy, we  
36  
37 selected only those who had at least three outpatient visits for RA treatment or those patients  
38  
39 who were admitted to the hospital with a primary diagnosis of RA during the study period.<sup>13</sup>  
40  
41  
42

43 The year when a patient was newly diagnosed with RA was defined as the index year.  
44

45 For each case of RA, we randomly selected, from the remaining insured population  
46  
47 without RA, four control subjects who were frequency matched to the RA case in terms of  
48  
49 gender, age and index year. After the exclusion of subjects with a diagnosis of depression  
50  
51 (ICD-9-CM 296.2, 296.3, 300.4 or 311) or stroke (ICD-9-CM 430-438) before the index date,  
52  
53 a total of 8045 RA patients and 32600 non-RA subjects were included in the data analysis.  
54  
55  
56 Occurrence of stroke or depression was defined based on the subject who had at least 3  
57  
58  
59  
60

1  
2  
3 outpatient service claims, or at least 1 inpatient hospitalization claim since 1996, when the  
4 computerized claims from the LHID were available, until the date of cohort entry. Thereafter,  
5 all subjects were followed up until the end of 2012 to measure the incidence of stroke. Only  
6 verified strokes that occurred one year following the first diagnosis of RA were included in  
7 order to render the temporal link between RA and stroke more plausible. We further stratified  
8 the RA cohort into two groups based on whether they were diagnosed with comorbid  
9 depression between the index date and the follow-up period. In accordance with the same  
10 rationale, the non-RA cohort was divided into two groups based on the existence (or no  
11 existence) of depression. Follow-up person-years (PYs) were calculated as the time interval  
12 from the entry date to the earliest occurrence of one of the following: a diagnosis of stroke,  
13 the date of withdrawal from insurance, or December 31, 2012, whichever came first.  
14  
15  
16  
17  
18  
19  
20  
21  
22  
23  
24  
25  
26  
27  
28  
29

### 30 **Demographic characteristics and comorbid conditions**

31 Demographic characteristics analyzed in this study included age, gender, monthly income,  
32 and level of urbanization of the subject's employment or residential area. Monthly income  
33 was grouped into 3 levels:  $\leq 17,880$  New Taiwan Dollars (NTD)\$, 17,881-43,900 NTD\$, and  
34  $\geq 43,901$ NTD\$. All 316 cities and townships in Taiwan were classified into 7 ordered levels  
35 of urbanization based on various indicators including population density, proportion of  
36 residents with college or higher education, percentage of elderly ( $> 65$  years of age) people,  
37 proportion of the workforce in agriculture, and number of physicians per  $10^5$  people.<sup>16</sup> Level  
38 1 refers to the “most urbanized” and level 7 refers to the “least urbanized” areas. The level of  
39 urbanization was further divided into 3 strata: urban (levels 1-2), suburban (levels 3-4), and  
40 rural (levels 5-7) areas. Baseline comorbid conditions for each subject included hypertension  
41 (ICD-9-CM 401-405), diabetes (ICD-9-CM 250), heart disease (ICD-9-CM 410-429),  
42 chronic kidney disease (ICD-9-CM 585), tobacco use (ICD-9-CM 305.1), alcohol  
43  
44  
45  
46  
47  
48  
49  
50  
51  
52  
53  
54  
55  
56  
57  
58  
59  
60

1  
2  
3 dependence syndrome (ICD-9-CM 303), and cancer (ICD-9-CM 140-208). The frequency of  
4  
5 ambulatory care visits within the study period for each subject was considered to correct for  
6  
7 surveillance bias.  
8  
9

### 10 11 **Statistical analysis**

12  
13 Intergroup differences were evaluated using the independent-sample t-test or nonparametric  
14  
15 Kolmogorov-Smirnov test for continuous variables, and the  $\chi^2$  test or Fisher exact test for  
16  
17 categorical variables. The incidence rate of stroke in the four groups is presented as the  
18  
19 number of cases per 1,000 PYs. To assess the risk of developing stroke across the four groups,  
20  
21 Cox proportional hazards regression model was applied to compute the crude and adjusted  
22  
23 hazard ratios (HRs) and the 95% confidence intervals (CI) for stroke among them. A  
24  
25 multivariate Cox proportional hazards regression model was then used to identify risk factors  
26  
27 that might be related to the incident of stroke and their adjusted HRs within RA cohorts. All  
28  
29 analyses were conducted using SAS version 9.3 (SAS Institute Inc., Cary, NC, USA), and  $p <$   
30  
31 0.05 was considered statistically significant.  
32  
33  
34  
35  
36  
37  
38

### 39 **RESULTS**

40  
41 Table 1 shows the distribution of demographic data and comorbid medical disorders for the  
42  
43 RA and non-RA cohorts. The RA cohorts were more likely to have a lower monthly income  
44  
45 ( $p = 0.001$ ), reside in a rural area ( $p < 0.001$ ), have more visits seeking medical care ( $p <$   
46  
47 0.001), and suffer comorbid conditions including hypertension, diabetes, heart disease,  
48  
49 chronic kidney disease or alcohol dependence syndrome (all  $p < 0.01$ ).  
50

51  
52 Of the total sample of 40,645 patients, 4550 had an incident stroke during the follow-up  
53  
54 period. The crude and adjusted HRs for stroke in patients with depression only, RA only, and  
55  
56 both, as a group, are shown in Table 2. Overall, after adjustment for potential confounders,  
57  
58  
59  
60

1  
2  
3 relative to those with neither RA nor depression, subjects with RA and depression exhibited  
4 the highest risk of developing a stroke, with an adjusted HRs of 2.18 (95% CI = 1.87-2.54),  
5 followed by those with depression (adjusted HRs = 1.57, 95% CI = 1.41-1.75), and those  
6 with RA only (adjusted HRs = 1.43, 95% CI = 1.12-1.55).  
7  
8  
9  
10

11 Table 3 presents Cox regression model of factors related to the onset of stroke among  
12 individuals with RA. Compared to those without depression, those with depression were  
13 significantly more likely to develop a stroke (adjusted HRs = 1.63, 95% CI = 1.37-1.92) after  
14 adjustment for confounding factors. Results also showed that age was related to the risk of  
15 stroke. There was a 5% increase in the risk of stroke for each 1-year increment (95% CI =  
16 1.03-1.08). Compared with females, males had an adjusted HRs of 1.17 for stroke (95% CI =  
17 1.03-1.28). Additionally, some comorbid conditions including hypertension, heart disease and  
18 diabetes increased the risk of stroke with adjusted HRs of 1.51 (95% CI = 1.40-1.84), 1.48  
19 (95% CI = 1.31-1.73) and 1.34 (95% CI = 1.16-1.56), respectively.  
20  
21  
22  
23  
24  
25  
26  
27  
28  
29  
30  
31  
32

### 33 DISCUSSION

34 Previous studies of the association between RA and the risk of stroke using  
35 hospital/community-based populations yielded mixed findings.<sup>4 8 9 17</sup> It is noteworthy that  
36 these studies essentially ignored the effect of accompanying depressive symptoms, a common  
37 psychological problem among RA patients, on the relationship between the two diseases. To  
38 the best of our knowledge, this was the first population-based, nationwide study which  
39 attempted to determine if depression modified the association between RA and stroke, and  
40 could therefore help to facilitate the provision of more appropriate interventions to  
41 successfully manage rheumatological disorders and prevent the subsequent risk of  
42 cardiovascular diseases.  
43  
44  
45  
46  
47  
48  
49  
50  
51  
52  
53  
54

55 This 15-year follow-up study found that individuals with RA had a 43% greater-adjusted  
56 risk of stroke when compared with the general population. These findings are in agreement  
57  
58  
59  
60

1  
2  
3 with the results of prior studies conducted in Western populations.<sup>8,9</sup> It has been argued that  
4  
5 rheumatological disorders are an overlapping group of conditions that are characterized by  
6  
7 chronic inflammation involving connective tissues and organs.<sup>1,6,18</sup> Once inflammation occurs  
8  
9 in the body, the vascular endothelial cells secrete proinflammatory cytokines, such as tumor  
10  
11 necrosis factor-alpha (TNF- $\alpha$ ) or interleukin (IL)-6, which activate and attract massive  
12  
13 numbers of white blood cells to the damaged region within the lumen of the vessel.  
14  
15 Following infiltration into the tunica media, white blood cells absorb oxidized LDL-C and  
16  
17 become foam cells, consequently accelerating the risk of thromboembolism.<sup>19</sup> In addition, a  
18  
19 growing body of evidence has shown that inflammatory cytokines stimulate the production of  
20  
21 matrix metalloproteinases (MMPs) as well, and this may cause further injury to  
22  
23 the blood-brain barrier, thereby provoking a greater susceptibility to stroke.<sup>20,21</sup>  
24  
25  
26

27  
28 A noteworthy feature of the current study herein was that once patients with RA were  
29  
30 diagnosed with comorbid depression during the treatment process, they exhibited more than  
31  
32 double the likelihood of stroke than the general population. We speculate that there are  
33  
34 several potential reasons as to why depression exacerbate the risk of stroke in these patients.  
35  
36 First, the presence of symptoms of depression is likely linked to treatment nonadherence and  
37  
38 an increase in unhealthy lifestyles, such as poor nutrition and physical inactivity, and these  
39  
40 may contribute to the development of a stroke.<sup>22</sup> Second, symptoms of depression can cause  
41  
42 systematic inflammation that worsens the manifestations of RA. Recent studies have  
43  
44 demonstrated that depressed individuals with RA had higher circulating levels of  
45  
46 inflammatory markers such as IL-6, TNF- $\alpha$  and C-reactive protein (CRP)<sup>10</sup>; all of which play  
47  
48 important roles in the pathogenesis of cardiovascular events.<sup>19</sup> It is also noteworthy that only  
49  
50 one in five patients with depression is estimated to have been treated and referred to  
51  
52 appropriate psychiatric services after the onset of RA.<sup>23</sup> The implementation of a  
53  
54 standardized psychosocial assessment, and of patient care procedures, as part of routine care  
55  
56  
57  
58  
59  
60



1  
2  
3 may therefore help in the early referral of high-risk patients for further therapeutic  
4  
5 interventions.  
6

7  
8 This study also indicated that males were at a 1.17-fold greater risk of stroke than females  
9  
10 in the RA cohorts. No previous study has examined gender differences in the risk of stroke  
11  
12 among patients with RA, which renders a comparison of results impossible. Nevertheless,  
13  
14 this is consistent with the observation that males have a higher risk of stroke than females  
15  
16 among the general population.<sup>24</sup> There are several possible explanations for this result. First,  
17  
18 women appear to have greater health consciousness with regard to stroke prevention than  
19  
20 men, and immediately seek medical therapy at the slightest irregularity in well-being, so the  
21  
22 onset of chronic diseases may be expected to be lower in women than in men.<sup>25</sup> Second,  
23  
24 lifetime exposure to ovarian estrogens may protect against the risk of stroke for females.  
25  
26 Extensive animal experiments and human studies have supported the function of estrogens as  
27  
28 neuroprotectants against neurodegenerative diseases, particularly stroke, through enhancing  
29  
30 basal release of Nitric Oxide (NO) to curb coronary thrombosis and atherosclerosis.<sup>24 26</sup>  
31  
32 Recently, estrogenic agents have been suggested as a novel therapeutic approach to treat the  
33  
34 neuronal damages associated with global ischemia.<sup>24 27</sup>  
35  
36  
37

38  
39 Consistent with the findings of prior studies conducted in the general population,<sup>18 24</sup> age  
40  
41 was positively correlated with the risk of stroke among patients with RA. We speculate that  
42  
43 with aging, blood vessels gradually lose elasticity and gain resistance, slowing the flow of  
44  
45 blood. Moreover, with poor circulation, fat is prone to accumulate in the abdomen and release  
46  
47 free fatty acids into the serum, leading to higher insulin resistance, elevated serum  
48  
49 triglycerides, and increased levels of LDL-C,<sup>28</sup> thereby resulting in the greater risk of stroke.  
50  
51

52  
53 Findings of this study indicate that patients with RA and several comorbid conditions such  
54  
55 as hypertension, diabetes or heart disease had a significantly greater risk for stroke. Those  
56  
57 with chronic kidney disease and cancer showed a tendency for stroke, but the association  
58  
59  
60

1  
2  
3 failed to reach statistical significance. Despite the lack of comparative studies on the effects  
4  
5 of comorbid conditions on stroke among patients with RA, our findings are consistent with  
6  
7 past arguments made in the literature.<sup>6</sup> The elevated risk of stroke may be attributed to  
8  
9 several causes. For example, insulin resistance and hypertension are common cardiovascular  
10  
11 risk factors among individuals with RA.<sup>29</sup> Moreover, the functional impairment induced by  
12  
13 comorbid conditions may lead to limited physical activity which could, very likely, trigger  
14  
15 additional risk of stroke. Finally, the immunosuppressive therapies used for patients with RA  
16  
17 have been found to have deleterious effects. Some review articles indicated that the use of  
18  
19 corticosteroids or non-steroidal anti-inflammatory drugs (NSAIDs) may be related to the risk  
20  
21 of cardiovascular events.<sup>6 19</sup> Before prescribing these drugs, rheumatologists should carefully  
22  
23 appraise the inherent cerebrovascular or cardiovascular risk among patients with RA.  
24  
25  
26

27  
28 Several limitations of this study should be considered when interpreting these results. First,  
29  
30 we could not account for some potential confounding factors such as social networks, coping  
31  
32 modes, or educational level because these data were unavailable in the LHID. Future research  
33  
34 controlling for those untested variables is needed to better determine if the present findings  
35  
36 are replica across diverse groups of individuals. Second, the identification of exposure and  
37  
38 outcome were based on the ICD-9-CM, and misclassification is inevitable. However, as the  
39  
40 approach to coding and the availability of data were similar regardless of case/control status,  
41  
42 we believe this bias is rather inconsequential. Additionally, we selected only those cases with  
43  
44 RA, depression or stroke after they were recorded as having either at least three outpatient  
45  
46 visits reporting consistent diagnoses, or one inpatient admission. Therefore, the approach  
47  
48 adopted is likely to minimize this error. It should also be noted that the NHI of Taiwan  
49  
50 randomly samples claims from hospitals, interviews patients, and reviews medical charts to  
51  
52 verify the accuracy of medical records. Third, since data regarding the severity of RA were  
53  
54 unavailable in this database, failure to adjust for the level of disability might lead to bias in  
55  
56  
57  
58  
59  
60

1  
2  
3 subject selection. Nonetheless, the multivariate analysis applied in this study considered the  
4 impact of several comorbid conditions including hypertension, diabetes, heart disease,  
5 chronic kidney disease, tobacco use, alcohol dependence syndrome and cancer. Furthermore,  
6 we performed a sensitivity analysis focusing on those RA subjects without comorbid  
7 conditions to test the robustness of our findings. This showed that depressed RA subjects with  
8 no known comorbid condition still had a higher risk of stroke when compared to those  
9 without RA and depression, with adjusted HRs of 1.65 (95% CI = 1.23-2.03). Fourth,  
10 evidence derived from any observational cohort study is generally less robust than that  
11 obtained from randomized control trials since cohort studies are subject to various biases  
12 related to confounding effects. Despite our careful efforts to maintain adequate control of  
13 confounding factors, unpredictable biases could still remain if they stem from unmeasured or  
14 unknown confounders. Notwithstanding these limitations, the strengths of this study must  
15 also be acknowledged and these include the immediate availability of data, the  
16 comprehensiveness of the database, and the statistical power derived from the samples' large  
17 sizes. In addition, this retrospective 15-year cohort study allowed us to clearly determine if  
18 the symptoms of depression exacerbated the risk of stroke for those with RA, and the  
19 corresponding findings could serve as a reference for future treatment strategies.

20  
21  
22  
23  
24  
25  
26  
27  
28  
29  
30  
31  
32  
33  
34  
35  
36  
37  
38  
39  
40  
41 In conclusion, this study demonstrated that patients with RA and comorbid depression  
42 were more than twice as likely to have a stroke than were those of the healthy controls. We  
43 further found that the factors contributing to the high risk of stroke included being male, older,  
44 as well as having depression and a comorbid condition such as hypertension, diabetes or heart  
45 disease. Healthcare providers may, therefore, be able to better recognize those demographic  
46 and diseases characteristics that contribute to the risk of stroke among patients with RA from  
47 this population-based study. The need to routinely screen RA patients for depression and  
48 institute culturally appropriate interventions should be emphasized. Healthcare providers  
49  
50  
51  
52  
53  
54  
55  
56  
57  
58  
59  
60

1  
2  
3 would benefit from being cognizant of the possible occurrence of depression among patients  
4  
5 with RA, discuss this often underreported issue with them, and strive to achieve better  
6  
7 clinical outcomes.  
8  
9

### 10 11 12 **Author affiliations**

13  
14 <sup>1</sup> Department of Medical Research, Dalin Tzuchi Hospital, The Buddhist Tzuchi Medical  
15  
16 Foundation, 2 Minsheng Road, Dalin Township, Chiayi 62247, Taiwan

17  
18 <sup>2</sup> Department of Environmental and Occupational Health, College of Medicine, National  
19  
20 Cheng Kung University, 138 Sheng-Li Road, Tainan 70428, Taiwan

21  
22 <sup>3</sup> Department of Nursing, Tzu Chi University of Science and Technology, 880 Chien-Kuo  
23  
24 Road Section 2, Hualien 62247, Taiwan

25  
26 <sup>4</sup> Division of Allergy, Immunology and Rheumatology, Dalin Tzuchi Hospital, The Buddhist  
27  
28 Tzuchi Medical Foundation, 2 Minsheng Road, Dalin Township, Chiayi 62247, Taiwan

29  
30 <sup>5</sup> School of Medicine, Tzu Chi University, 701 Jhongyang Road Section 3, Hualien 97004,  
31  
32 Taiwan

33  
34 <sup>6</sup> Rehabilitation Counseling Program, Portland State University, Portland, OR 97207-0751,  
35  
36 USA

37  
38 <sup>7</sup> Department of Nursing, Dalin Tzuchi Hospital, The Buddhist Tzuchi Medical Foundation, 2  
39  
40 Minsheng Road, Dalin Township, Chiayi 62247, Taiwan

41  
42 <sup>8</sup> Department of Occupational and Environmental Medicine, National Cheng Kung University  
43  
44 Hospital, 138 Sheng-Li Road, Tainan 70428, Taiwan

45  
46 <sup>9</sup> Occupational Safety, Health, and Medicine Research Center, National Cheng Kung  
47  
48 University, 138 Sheng-Li Road, Tainan 70428, Taiwan

49  
50  
51  
52  
53  
54  
55  
56  
57  
58 **Acknowledgements** The study is based in part on data from the National Health Insurance  
59  
60

1  
2  
3 Research Database provided by the Bureau of National Health Insurance, Department of  
4 Health and managed by National Health Research Institutes. The interpretation and  
5 conclusions contained herein do not represent those of the Bureau of National Health  
6 Insurance, Department of Health or National Health Research Institutes. This research was  
7 supported by Dalin Tzuchi Hospital (Grant Number DTCRD103(2)-E-05). Chiu SY and Guo  
8 HR contributed equally to this work.  
9  
10  
11  
12  
13  
14  
15  
16  
17  
18

19 **Contributors** All the authors approved the contents of the submitted article. Conceived and  
20 designed the experiments: TTY CSY. Analyzed the data: TTY GHR. Contributed  
21 reagents/materials/analysis tools: TTY LNS LMC GHR. Wrote the paper: TTY LH GHR.  
22 Final approval of manuscript: TTY LNS LH CSY LMC GHR.  
23  
24  
25  
26  
27  
28

29 **Competing interests** The authors declare no competing financial interests.  
30  
31  
32  
33

34 **Ethics approval** This study was approved by the Research Ethics Committee of Dalin Tzuchi  
35 Hospital (No. No. B10004021-1).  
36  
37  
38  
39

40 **Data sharing statement** No additional data are available.  
41  
42  
43  
44

45 **Funding** The researcher received no specific grant from any funding agency in the public,  
46 commercial or not-for-profit sectors.  
47  
48  
49  
50

## 51 52 53 54 55 56 **References** 57 58 59 60

- 1 Rindfleisch JA, Muller D. Diagnosis and management of rheumatoid arthritis. *Am Fam Physician* 2005;72:1037-47.
- 2 Birnbaum H, Pike C, Kaufman R, *et al.* Societal cost of rheumatoid arthritis patients in the US. *Curr Med Res Opin* 2010;26:77-90.
- 3 Lassere MN, Rappo J, Portek IJ, *et al.* How many life years are lost in patients with rheumatoid arthritis? Secular cause-specific and all-cause mortality in rheumatoid arthritis, and their predictors in a long-term Australian cohort study. *Intern Med J* 2013;43:66-72.
- 4 Lévy L, Fautrel B, Barnetche T, *et al.* Incidence and risk of fatal myocardial infarction and stroke events in rheumatoid arthritis patients. A systematic review of the literature. *Clin Exp Rheumatol* 2008;26:673-79.
- 5 Sokka T, Abelson B, Pincus T. Mortality in rheumatoid arthritis: 2008 update. *Clin Exp Rheumatol* 2008;26:S35-61.
- 6 Zha AM, Napoli M, Behrouz R. Prevention of stroke in rheumatoid arthritis. *Curr Neurol Neurosci Rep* 2015;15:1-10.
- 7 Farmer A, Korszun A, Owen MJ, *et al.* Medical disorders in people with recurrent depression. *Br J Psychiatry* 2008;192:351-5.
- 8 Meune C, Touzé E, Trinquart L, *et al.* High risk of clinical cardiovascular events in rheumatoid arthritis: levels of associations of myocardial infarction and stroke through a systematic review and meta-analysis. *Arch Cardiovasc Dis* 2010;103:253-61.
- 9 Lindhardsen J, Ahlehoff O, Gislason GH, *et al.* Risk of atrial fibrillation and stroke in rheumatoid arthritis: Danish nationwide cohort study. *BMJ* 2012;344:e1257.
- 10 Margaretten M, Julian L, Katz P, *et al.* Depression in patients with rheumatoid arthritis: description, causes and mechanisms. *Int J Clin Rheumatol* 2011;6:617-23.
- 11 Ang DC, Choi H, Kroenke K, *et al.* Comorbid depression is an independent risk factor for mortality in patients with rheumatoid arthritis. *J Rheumatol* 2005;32:1013-19.
- 12 Matcham F, Rayner L, Steer S, *et al.* The prevalence of depression in rheumatoid arthritis: a systematic review and meta-analysis. *Rheumatology (Oxford)* 2013;52:2136-48.
- 13 Lu M, Guo HR, Lin MC, *et al.* Bidirectional associations between rheumatoid arthritis and depression: a nationwide longitudinal study. *Sci Rep* 2016;6:20647.
- 14 Joyce AT, Smith P, Khandker R, *et al.* Hidden cost of rheumatoid arthritis (RA): estimating cost of comorbid cardiovascular disease and depression among patients with RA. *J Rheumatol* 2009;36:743-52.
- 15 National Health Insurance Research Database, Taiwan. [http://nhird.nhri.org.tw/date\\_cohort.html](http://nhird.nhri.org.tw/date_cohort.html) (accessed 8 May 2015).
- 16 Liu CY, Hung YT, Chuang YL, *et al.* Incorporating development stratification of

- 1  
2  
3 Taiwan townships into sampling design of large scale health interview survey. *J*  
4 *Health Manag* 2006;4:1-22.  
5  
6 17 Liou TH, Huang SW, Lin JW, *et al.* Risk of stroke in patients with rheumatism: a  
7 nationwide longitudinal population-based study. *Sci Rep* 2014;4: 5110.  
8  
9 18 Behrouz R. The risk of ischemic stroke in major rheumatic disorders. *J Neuroimmunol*  
10 2014;277:1-5.  
11  
12 19 van den Oever, IA, van Sijl AM, Nurmohamed MT. Management of cardiovascular  
13 risk in patients with rheumatoid arthritis: evidence and expert opinion. *Ther Adv*  
14 *Musculoskelet Dis* 2013;5:166-81.  
15  
16 20 Lakhan SE, Kirchgessner A, Tepper D, *et al.* Matrix metalloproteinases and  
17 blood-brain barrier disruption in acute ischemic stroke. *Front Neurol* 2013;4:32.  
18  
19 21 Yang Y, Rosenberg GA. Matrix metalloproteinases as therapeutic targets for stroke.  
20 *Brain Res* 2015;1623:30-8.  
21  
22 22 Lee HC, Lin HC, Tsai SY. Severely depressed young patients have over five times  
23 increased risk for stroke: a 5-year follow-up study. *Biol Psychiatry* 2008;64:912-5.  
24  
25 23 Sleath B, Chewing B, de Vellis BM, *et al.* Communication about depression during  
26 rheumatoid arthritis patient visits. *Arthritis Rheum* 2008;59:186-91.  
27  
28 24 Appelros P, Stegmayr B, Terént A. Sex differences in stroke epidemiology: a  
29 systematic review. *Stroke* 2009;40:1082-90.  
30  
31 25 Stroebele N, Müller-Riemenschneider F, Nolte CH, *et al.* Knowledge of risk factors,  
32 and warning signs of stroke: a systematic review from a gender perspective. *Int J*  
33 *Stroke* 2011;6:60-6.  
34  
35 26 Liu R, Yang SH. Window of opportunity: estrogen as a treatment for ischemic stroke.  
36 *Brain Res* 2013;1514:83-90.  
37  
38 27 Etgen AM, Jover-Mengual T, Zukin RS. Neuroprotective actions of estradiol and  
39 novel estrogen analogs in ischemia: translational implications. *Front Neuroendocrinol*  
40 2011;32:336-52.  
41  
42 28 Ai M, Otokozawa S, Asztalos BF, *et al.* Small dense LDL cholesterol and coronary  
43 heart disease: results from the Framingham offspring study. *Clin Chem*  
44 2010;56:967-76.  
45  
46 29 Liao KP, Solomon DH. Traditional cardiovascular risk factors, inflammation and  
47 cardiovascular risk in rheumatoid arthritis. *Rheumatology* 2013;52:45-52.  
48  
49  
50  
51  
52  
53  
54  
55  
56  
57  
58  
59  
60

**Table 1 Demographic data and comorbidity comparison of the study subjects.**



| Variables                                                         | Non-RA cohort                    | RA cohort                        | P      |
|-------------------------------------------------------------------|----------------------------------|----------------------------------|--------|
|                                                                   | N = 32600 (%)                    | N = 8045(%)                      |        |
| Age (years)                                                       |                                  |                                  | 0.85   |
| <=40                                                              | 5378(16.5)                       | 1331(16.5)                       |        |
| 41-60                                                             | 15569(47.8)                      | 3814(47.4)                       |        |
| 60 <sup>+</sup>                                                   | 11653(35.7)                      | 2900(36.0)                       |        |
| Mean ± Standard Deviation (SD)                                    | 55.00±14.63                      | 55.01±14.65                      | 0.94   |
| Gender                                                            |                                  |                                  | 0.95   |
| Female                                                            | 22461(68.9)                      | 5540(68.9)                       |        |
| Male                                                              | 10139(31.1)                      | 2505(31.1)                       |        |
| Monthly income                                                    |                                  |                                  | <0.001 |
| Low                                                               | 15218(46.7)                      | 3513(43.7)                       |        |
| Median                                                            | 15985(49.0)                      | 4213(52.4)                       |        |
| High                                                              | 1397(4.3)                        | 319(4.0)                         |        |
| Level of urbanization                                             |                                  |                                  | <0.001 |
| Urban                                                             | 18839(57.8)                      | 4485(55.7)                       |        |
| Suburban                                                          | 5311(16.3)                       | 1258(15.6)                       |        |
| Rural                                                             | 8450(25.9)                       | 2302(28.6)                       |        |
| Comorbidity                                                       |                                  |                                  |        |
| Hypertension                                                      | 5965(21.2)                       | 2216(27.6)                       | <0.001 |
| Diabetes                                                          | 2717(9.6)                        | 1046(13.0)                       | <0.001 |
| Heart disease                                                     | 3054(10.8)                       | 1273(15.8)                       | <0.001 |
| Chronic kidney disease                                            | 264(0.9)                         | 123(1.5)                         | <0.001 |
| Cancer                                                            | 959(3.4)                         | 268(3.3)                         | 0.75   |
| Alcohol dependence syndrome                                       | 30(0.1)                          | 18(0.2)                          | 0.002  |
| Tobacco use                                                       | 36(0.1)                          | 10(0.1)                          | 0.74   |
| Visits seeking medical care                                       |                                  |                                  |        |
| Mean ± SD (median, 25 <sup>th</sup> -75 <sup>th</sup> percentile) | 234.55 ± 194.08<br>(185, 97-319) | 159.90 ± 155.87<br>(114, 52-219) | <0.001 |

**Table 2 Crude and adjusted HRs of stroke for those with RA and comorbid depression,**



those with RA only, those with depression only as compared to those with neither RA nor depression.

| Patient group             | Event | PY        | Incidence | Crude HRs<br>(95% CI) | Adjusted HRs *<br>(95% CI) |
|---------------------------|-------|-----------|-----------|-----------------------|----------------------------|
| <b>Non-RA cohort</b>      |       |           |           |                       |                            |
| Neither RA nor depression | 3063  | 245086.81 | 12.50     | 1.00                  | 1.00                       |
| Depression only           | 377   | 24540.32  | 15.36     | 1.23<br>(1.11-1.37)   | 1.57<br>(1.41-1.75)        |
| <b>RA cohort</b>          |       |           |           |                       |                            |
| RA only                   | 929   | 55223.83  | 16.82     | 1.35<br>(1.25-1.45)   | 1.43<br>(1.12-1.55)        |
| RA and depression         | 181   | 9901.31   | 18.28     | 1.48<br>(1.26-1.71)   | 2.18<br>(1.87-2.54)        |

per 1,000 person-years for incidence rate.

\*Adjusted for age, gender, level of urbanization, income, visits seeking medical care, and comorbidity

**Table 3 Multivariate analysis of factors for the incidence of stroke among patients with RA.**

| Variables                   | Cox regression model (n=8045) |           |
|-----------------------------|-------------------------------|-----------|
|                             | Adjusted HRs*                 | 95% CI    |
| Depression                  |                               |           |
| No                          | 1                             |           |
| Yes                         | 1.63                          | 1.37-1.92 |
| Age                         | 1.05                          | 1.03-1.08 |
| Gender                      |                               |           |
| Female                      | 1                             |           |
| Male                        | 1.17                          | 1.03-1.28 |
| Monthly income              |                               |           |
| Low                         | 1                             |           |
| Median                      | 0.97                          | 0.85-1.10 |
| High                        | 0.85                          | 0.58-1.26 |
| Level of urbanization       |                               |           |
| Urban                       | 1                             |           |
| Suburban                    | 1.10                          | 0.92-1.30 |
| Rural                       | 1.06                          | 0.92-1.22 |
| Comorbidity                 |                               |           |
| Hypertension                |                               |           |
| No                          | 1                             |           |
| Yes                         | 1.51                          | 1.40-1.84 |
| Diabetes                    |                               |           |
| No                          | 1                             |           |
| Yes                         | 1.34                          | 1.16-1.56 |
| Heart disease               |                               |           |
| No                          | 1                             |           |
| Yes                         | 1.48                          | 1.31-1.73 |
| Chronic kidney disease      |                               |           |
| No                          | 1                             |           |
| Yes                         | 1.02                          | 0.76-1.30 |
| Cancer                      |                               |           |
| No                          | 1                             |           |
| Yes                         | 1.12                          | 0.84-1.47 |
| Visits seeking medical care | 0.99                          | 0.98-1.01 |

Adjusted for all variables in the model.

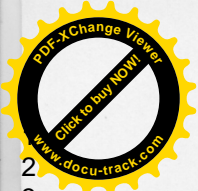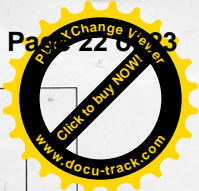

STROBE 2007 (v4) Statement—Checklist of items that should be included in reports of cohort studies

| Section/Topic                | Item # | Recommendation                                                                                                                                                                       | Reported on page # |
|------------------------------|--------|--------------------------------------------------------------------------------------------------------------------------------------------------------------------------------------|--------------------|
| Title and abstract           | 1      | (a) Indicate the study's design with a commonly used term in the title or the abstract                                                                                               | P1                 |
|                              |        | (b) Provide in the abstract an informative and balanced summary of what was done and what was found                                                                                  | P 3-P4             |
| <b>Introduction</b>          |        |                                                                                                                                                                                      |                    |
| Background/rationale         | 2      | Explain the scientific background and rationale for the investigation being reported                                                                                                 | P5-P6              |
| Objectives                   | 3      | State specific objectives, including any prespecified hypotheses                                                                                                                     | P6                 |
| <b>Methods</b>               |        |                                                                                                                                                                                      |                    |
| Study design                 | 4      | Present key elements of study design early in the paper                                                                                                                              | P6                 |
| Setting                      | 5      | Describe the setting, locations, and relevant dates, including periods of recruitment, exposure, follow-up, and data collection                                                      | P6-P7              |
| Participants                 | 6      | (a) Give the eligibility criteria, and the sources and methods of selection of participants. Describe methods of follow-up                                                           | P8                 |
|                              |        | (b) For matched studies, give matching criteria and number of exposed and unexposed                                                                                                  | P7                 |
| Variables                    | 7      | Clearly define all outcomes, exposures, predictors, potential confounders, and effect modifiers. Give diagnostic criteria, if applicable                                             | P7-P8              |
| Data sources/<br>measurement | 8*     | For each variable of interest, give sources of data and details of methods of assessment (measurement). Describe comparability of assessment methods if there is more than one group | P8-P9              |
| Bias                         | 9      | Describe any efforts to address potential sources of bias                                                                                                                            | P9                 |
| Study size                   | 10     | Explain how the study size was arrived at                                                                                                                                            | P7.                |
| Quantitative variables       | 11     | Explain how quantitative variables were handled in the analyses. If applicable, describe which groupings were chosen and why                                                         | P7-P9              |
| Statistical methods          | 12     | (a) Describe all statistical methods, including those used to control for confounding                                                                                                | P9.                |
|                              |        | (b) Describe any methods used to examine subgroups and interactions                                                                                                                  | P9                 |
|                              |        | (c) Explain how missing data were addressed                                                                                                                                          | NA                 |
|                              |        | (d) If applicable, explain how loss to follow-up was addressed                                                                                                                       | P8                 |
|                              |        | (e) Describe any sensitivity analyses                                                                                                                                                | P14                |
| <b>Results</b>               |        |                                                                                                                                                                                      |                    |

2  
3  
4  
5  
6  
7  
8  
9  
10  
11  
12  
13  
14  
15  
16  
17  
18  
19  
20  
21  
22  
23  
24  
25  
26  
27  
28  
29  
30  
31  
32  
33  
34  
35  
36  
37  
38  
39  
40  
41  
42  
43  
44  
45  
46  
47  
48  
49  
50  
51  
52  
53  
54  
55  
56  
57  
58  
59  
60



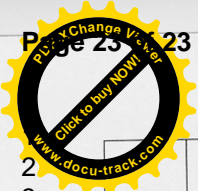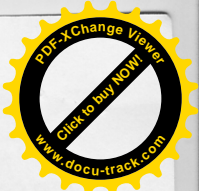

2  
3  
4  
5  
6  
7  
8  
9  
10  
11  
12  
13  
14  
15  
16  
17  
18  
19  
20  
21  
22  
23  
24  
25  
26  
27  
28  
29  
30  
31  
32  
33  
34  
35  
36  
37  
38  
39  
40  
41  
42  
43  
44  
45  
46  
47  
48  
49  
50  
51  
52  
53  
54  
55  
56  
57  
58  
59  
60

|                          |     |                                                                                                                                                                                                                                                                                                 |                    |
|--------------------------|-----|-------------------------------------------------------------------------------------------------------------------------------------------------------------------------------------------------------------------------------------------------------------------------------------------------|--------------------|
| Participants             | 13* | (a) Report numbers of individuals at each stage of study—eg numbers potentially eligible, examined for eligibility, confirmed eligible, included in the study, completing follow-up, and analysed<br>(b) Give reasons for non-participation at each stage<br>(c) Consider use of a flow diagram | p9-p10<br>NA<br>NA |
| Descriptive data         | 14* | (a) Give characteristics of study participants (eg demographic, clinical, social) and information on exposures and potential confounders                                                                                                                                                        | p9                 |
|                          |     | (b) Indicate number of participants with missing data for each variable of interest                                                                                                                                                                                                             | NA                 |
|                          |     | (c) Summarise follow-up time (eg, average and total amount)                                                                                                                                                                                                                                     | p20<br>p9, p20     |
| Outcome data             | 15* | Report numbers of outcome events or summary measures over time                                                                                                                                                                                                                                  | p10, p20           |
| Main results             | 16  | (a) Give unadjusted estimates and, if applicable, confounder-adjusted estimates and their precision (eg, 95% confidence interval). Make clear which confounders were adjusted for and why they were included                                                                                    | p20                |
|                          |     | (b) Report category boundaries when continuous variables were categorized                                                                                                                                                                                                                       | NA                 |
|                          |     | (c) If relevant, consider translating estimates of relative risk into absolute risk for a meaningful time period                                                                                                                                                                                | p20                |
| Other analyses           | 17  | Report other analyses done—eg analyses of subgroups and interactions, and sensitivity analyses                                                                                                                                                                                                  |                    |
| <b>Discussion</b>        |     |                                                                                                                                                                                                                                                                                                 |                    |
| Key results              | 18  | Summarise key results with reference to study objectives                                                                                                                                                                                                                                        | p10                |
| <b>Limitations</b>       |     |                                                                                                                                                                                                                                                                                                 |                    |
| Interpretation           | 20  | Give a cautious overall interpretation of results considering objectives, limitations, multiplicity of analyses, results from similar studies, and other relevant evidence                                                                                                                      | p13-p14            |
| Generalisability         | 21  | Discuss the generalisability (external validity) of the study results                                                                                                                                                                                                                           | p14-p15            |
| <b>Other information</b> |     |                                                                                                                                                                                                                                                                                                 |                    |
| Funding                  | 22  | Give the source of funding and the role of the funders for the present study and, if applicable, for the original study on which the present article is based                                                                                                                                   | p16                |

\*Give information separately for cases and controls in case-control studies and, if applicable, for exposed and unexposed groups in cohort and cross-sectional studies.

**Note:** An Explanation and Elaboration article discusses each checklist item and gives methodological background and published examples of transparent reporting. The STROBE checklist is best used in conjunction with this article (freely available on the Web sites of PLoS Medicine at <http://www.plosmedicine.org/>, Annals of Internal Medicine at <http://www.annals.org/>, and Epidemiology at <http://www.epidem.com/>). Information on the STROBE Initiative is available at [www.strobe-statement.org](http://www.strobe-statement.org).

# BMJ Open

## Does depression increase the risk of stroke in patients with rheumatoid arthritis? A population-based cohort study

|                                 |                                                                                                                                                                                                                                                                                                                                                                                                                                                                                                                                                                                                                                                        |
|---------------------------------|--------------------------------------------------------------------------------------------------------------------------------------------------------------------------------------------------------------------------------------------------------------------------------------------------------------------------------------------------------------------------------------------------------------------------------------------------------------------------------------------------------------------------------------------------------------------------------------------------------------------------------------------------------|
| Journal:                        | <i>BMJ Open</i>                                                                                                                                                                                                                                                                                                                                                                                                                                                                                                                                                                                                                                        |
| Manuscript ID                   | bmjopen-2016-014233.R1                                                                                                                                                                                                                                                                                                                                                                                                                                                                                                                                                                                                                                 |
| Article Type:                   | Research                                                                                                                                                                                                                                                                                                                                                                                                                                                                                                                                                                                                                                               |
| Date Submitted by the Author:   | 03-Nov-2016                                                                                                                                                                                                                                                                                                                                                                                                                                                                                                                                                                                                                                            |
| Complete List of Authors:       | Tsai, Tzung-Yi; Buddhist Dalin Tzu Chi General Hospital, Department of Medical Research<br>Lu, Ming-Chi ; Dalin Tzuchi Hospital, The Buddhist Tzuchi Medical Foundation, Division of Allergy, Immunology and Rheumatology<br>Livneh, Hanoch ; Portland State University, Portland, OR 97207-0751, USA<br>Chiu, Shan-Yan ; Dalin Tzuchi Hospital, The Buddhist Tzuchi Medical Foundation, Department of Nursing<br>Lai, Ning-Sheng; Buddhist Dalin Tzu Chi General Hospital, Division of Allergy, Immunology and Rheumatology<br>Guo, How-Ran; National Cheng Kung University, Department of Environmental and Occupational Health, College of Medicine |
| <b>Primary Subject Heading</b>: | Rheumatology                                                                                                                                                                                                                                                                                                                                                                                                                                                                                                                                                                                                                                           |
| Secondary Subject Heading:      | Rheumatology, Mental health, Neurology                                                                                                                                                                                                                                                                                                                                                                                                                                                                                                                                                                                                                 |
| Keywords:                       | rheumatoid arthritis, Depression & mood disorders < PSYCHIATRY, Stroke < NEUROLOGY, cohort study                                                                                                                                                                                                                                                                                                                                                                                                                                                                                                                                                       |
|                                 |                                                                                                                                                                                                                                                                                                                                                                                                                                                                                                                                                                                                                                                        |

SCHOLARONE™  
Manuscripts

only

1  
2  
3 1 **Does depression increase the risk of stroke in patients with rheumatoid arthritis? A**  
4  
5 2 **population-based cohort study**  
6  
7  
8  
9  
10  
11  
12  
13

14  
15  
16  
17 4 Tzung-Yi Tsai<sup>1,2,3</sup>, Ming-Chi Lu<sup>4,5</sup>, Hanoch Livneh<sup>6</sup>, Shan-Yun Chiu<sup>7</sup>, Ning-Sheng Lai<sup>4,5</sup>,  
18  
19 5 How-Ran Guo<sup>2,8,9\*</sup>  
20  
21  
22  
23  
24  
25  
26  
27  
28  
29

30  
31  
32 7 <sup>1</sup> Department of Medical Research, Dalin Tzuchi Hospital, The Buddhist Tzuchi Medical  
33  
34 8 Foundation, 2 Minsheng Road, Dalin Township, Chiayi 62247, Taiwan  
35  
36  
37  
38  
39  
40  
41  
42

43  
44 9 <sup>2</sup> Department of Environmental and Occupational Health, College of Medicine, National  
45  
46 10 Cheng Kung University, 138 Sheng-Li Road, Tainan 70428, Taiwan  
47  
48  
49  
50  
51  
52  
53  
54

55  
56 11 <sup>3</sup> Department of Nursing, Tzu Chi University of Science and Technology, 880 Chien-Kuo  
57  
58 12 Road Section 2, Hualien 62247, Taiwan  
59  
60  
61  
62  
63  
64  
65  
66

67  
68 13 <sup>4</sup> Division of Allergy, Immunology and Rheumatology, Dalin Tzuchi Hospital, The Buddhist  
69  
70 14 Tzuchi Medical Foundation, 2 Minsheng Road, Dalin Township, Chiayi 62247, Taiwan  
71  
72  
73  
74  
75  
76  
77  
78

79  
80 15 <sup>5</sup> School of Medicine, Tzu Chi University, 701 Jhongyang Road Section 3, Hualien 97004,  
81  
82 16 Taiwan  
83  
84  
85  
86  
87  
88  
89  
90

91  
92 17 <sup>6</sup> Rehabilitation Counseling Program, Portland State University, Portland, OR 97207-0751,  
93  
94 18 USA  
95  
96  
97  
98  
99  
100  
101  
102

103  
104 19 <sup>7</sup> Department of Nursing, Dalin Tzuchi Hospital, The Buddhist Tzuchi Medical Foundation, 2  
105  
106 20 Minsheng Road, Dalin Township, Chiayi 62247, Taiwan  
107  
108  
109  
110  
111  
112  
113  
114

115  
116 21 <sup>8</sup> Department of Occupational and Environmental Medicine, National Cheng Kung University  
117  
118 22 Hospital, 138 Sheng-Li Road, Tainan 70428, Taiwan  
119  
120  
121  
122  
123  
124  
125  
126

127  
128 23 <sup>9</sup> Occupational Safety, Health, and Medicine Research Center, National Cheng Kung  
129  
130 24 University, 138 Sheng-Li Road, Tainan 70428, Taiwan  
131  
132  
133  
134  
135  
136  
137  
138

139  
140  
141  
142  
143  
144  
145  
146  
147  
148  
149  
150  
151  
152  
153  
154  
155  
156  
157  
158  
159  
160

1 Correspondence and requests for materials should be addressed to Guo HR.

2 Email: dm732024@tzuchi.com.tw or hrguo@mail.ncku.edu.tw

3 TEL: 886-5-2648000 ext. 3209

4 FAX: 886-5-2648000 ext. 3241

5

6

7

8

9

10

11

12

13

14

15

16

17

18

19

20



1  
2  
3 1 **ABSTRACT**

4  
5 2 **Objectives:** Comorbid depression is common and undertreated in patients with rheumatoid  
6  
7 3 arthritis (RA). It remains uncertain whether comorbid depression provoked the risk of poor  
8  
9 4 clinical outcome, stroke in particular, among RA patients. This work aimed to determine if  
10  
11 5 depression onset during the treatment process increases stroke risk for patients with RA as  
12  
13 6 compared to those with (a) neither RA nor depression, (b) RA only, and (c) depression only.

14  
15  
16 7 **Design:** A nationwide, population-based cohort study.

17  
18 8 **Setting:** Taiwan's Longitudinal Health Insurance Database.

19  
20  
21 9 **Participants:** We identified 8,045 subjects with a newly diagnosed RA between 1997 and  
22  
23 10 2010, together with 32,600 subjects without RA matched by age, gender and index date. All  
24  
25 11 subjects were further divided into four groups based on whether they were diagnosed with  
26  
27 12 comorbid depression during the follow-up period.

28  
29  
30 13 **Main outcome measure:** The incidence rate and hazard ratio for incident stroke were  
31  
32 14 estimated by the end of 2012 using Cox proportional-hazard regression.

33  
34 15 **Results:** We discovered that RA patients with the comorbid depression exhibited the highest  
35  
36 16 risk of stroke, with an adjusted hazard ratios (HRs) of 2.18 (95% confidence interval =  
37  
38 17 1.87-2.54). Those with RA only or those with depression only still had the higher risk of  
39  
40 18 stroke by 43% and 57% as compared with subjects without either condition. Multivariate  
41  
42 19 analysis showed RA subjects who were male or older, incurred the onset of depression, or had  
43  
44 20 comorbidities such as hypertension, diabetes as well as heart disease had a greater risk of  
45  
46 21 stroke.

47  
48  
49 22 **Conclusions:** This study cleared up the significant association between RA and the  
50  
51 23 subsequent risk of stroke, and further highlighted that the onset of depression within the  
52  
53 24 treatment process may increase stroke risk for RA subjects. Findings could assist healthcare  
54  
55 25 providers to pinpoint RA individuals with a higher predisposition of stroke, which could



1 facilitate the provision of appropriate rehabilitation.

2 **Keywords** : rheumatoid arthritis, depression, stroke, cohort study

3  
4  
5 **Strengths and limitations of this study**

6 ● The main outcome measures employed in this work are validated due to the application  
7 of population-based cohort study, based on a nationwide claim database, thus decreasing  
8 recall and selection bias.

9 ● This is the first report to clarify the effect of comorbid depression on the stroke risk  
10 among RA subjects, which was beneficial for healthcare providers in guiding more  
11 effective treatment strategies to improve the clinical outcomes for them.

12 ● Misclassification of diseases and failure to adjust for disease severity might lead to  
13 somewhat skewed findings

## 1 INTRODUCTION

2 Rheumatoid arthritis (RA) is a systemic autoimmune disease manifested as long-term joint  
3 damage, chronic debilitating pain, and premature mortality. This disease often affects people  
4 30 to 50 years of age and results in disability and inability to work, thus posing a heavy  
5 burden on patients with RA, their families and the healthcare system.<sup>1</sup> A review of the  
6 financial burdens of RA in the United States showed that the annual direct medical costs of  
7 RA reached about \$9 billion, and the total societal costs (the sum of direct and indirect costs)  
8 was estimated to exceed \$39 billion.<sup>2</sup>

9 Despite improvements in the diagnosis and treatment of RA, patients with RA still have a  
10 lower life expectancy (6-7 years) when compared with the general population.<sup>3</sup> This  
11 increased mortality is due primarily to cardiovascular diseases such as myocardial infarction  
12 (MI) or stroke.<sup>4-6</sup> Nevertheless, unlike the studies of RA predicting the onset of MI,<sup>4 7 8</sup>  
13 evidence for an association between RA and the development of stroke remains conflicting. A  
14 meta-analysis of 15 articles indicated that individuals with RA had a 63% higher risk for MI,  
15 but not for stroke [odds ratio (OR)= 1.14, 95% confidence interval (CI) = 0.86-1.51] when  
16 compared to the general population.<sup>4</sup> On the other hand, a recent Danish study involving  
17 18,247 patients with RA, who were followed for a median of 4.8 years, indicated that those  
18 with RA had a 30% higher risk of stroke than a non-RA group.<sup>9</sup> Another meta-analysis of 17  
19 studies reported that patients with RA had a higher predisposition to develop stroke than did  
20 non-RA subjects, with a pool risk of 1.91.<sup>8</sup>

21 One cause for concern is that the former studies did not consider the effect of  
22 accompanying psychological factors on the risk of stroke; depression, in particular, which is  
23 often underdiagnosed and undertreated.<sup>10</sup> Depression, a well-documented comorbidity among  
24 people with chronic diseases, specifically arthritis, may exacerbate functional disabilities,  
25 affect adherence to treatment, and be a barrier to self-care and self-management behaviors.<sup>11</sup>

1 A recent meta-analysis estimated that the prevalence of depression among patients with RA  
2 ranges from 14.8 to 38.8%,<sup>12</sup> and findings from our previous study indicated that RA patients  
3 were nearly twice as likely to experience depression as the general population.<sup>13</sup> Indeed, once  
4 patients with RA suffered from concomitant depression, they had a 7.2% increase in medical  
5 costs (\$12,225 vs. \$11,404),<sup>14</sup> and their likelihood of mortality more than doubled.<sup>11</sup> Given  
6 the alarming rate of depression and the corresponding physical burden on patients with RA, it  
7 is imperative to implement effective therapeutic interventions to achieve more favorable  
8 therapeutic outcomes, thus serving to extend the life expectancy of patients with RA. Notably,  
9 based on former research, the activation of innate inflammatory mechanisms that accompany  
10 depressive mood was assumed to affect the susceptibility to development of cardiovascular  
11 diseases in addition to the influence of behavioral factors,<sup>15-18</sup> implying that the causative  
12 role of depression should not be neglected as determining the association of RA with stroke.

13 With this growing evidence on the association between RA and subsequent risk of stroke,  
14 and the limited information on whether depression serves as a potential factor that affects the  
15 relationship between these two conditions, findings from a long-term population-based  
16 nationwide study could be useful in allocating medical resources and in instituting fact-based  
17 policymaking. Nevertheless, to date, no clinical observations or empirical data have  
18 documented this concern. The aim of this cohort study, therefore, was to determine if RA  
19 patients with the comorbid depression were at an increased risk for stroke as compared to  
20 those with (a) neither RA nor depression, (b) RA only, and (c) depression only, using claims  
21 data from the National Health Insurance (NHI) of Taiwan.

## 22 **METHODS**

### 23 **Data sources**

24 The data analyzed in this cohort study were retrieved from the Longitudinal Health Insurance  
25

1 Database (LHID), maintained by the Bureau of NHI (BNHI) and provided to scientists in  
2 Taiwan for research purposes. Taiwan launched a single-payer NHI Program in 1995 in order  
3 to remove financial barriers to medical care for all legal residents. At the end of 2010, more  
4 than 99% of Taiwan's population had enrolled in this program.<sup>19</sup> The LHID is a subset of the  
5 NHI database, and contains comprehensive utilization and enrollment information for one  
6 million randomly selected NHI beneficiaries, representing 5% of all enrollees in Taiwan in  
7 2000. Because a multistage stratified systematic sampling method was used for this study,  
8 there were no statistically significant differences regarding gender or age between the  
9 sampled group and the total number of enrollees.<sup>19</sup> This study complied with the guidelines  
10 of the Declaration of Helsinki and was approved by the local institutional review board and  
11 ethics committee of Buddhist Dalin Tzu Chi Hospital, Taiwan (No. B10004021-1). As the  
12 LHID data files contained only de-identified secondary data, the need for informed consent  
13 from individual patient consent was waived by the institutional review board.

### 14 **Study subjects**

15 Diagnoses in the insurance claims data were coded according to the International  
16 Classification of Disease, 9th Revision, Clinical Modification (ICD-9-CM). The LHID  
17 records were used to identify patients with RA in the age bracket 20-to-90 years of age, and  
18 newly diagnosed patients between 1997 and 2010. Those who were diagnosed with an  
19 ICD-9-CM code of 714.0 comprised the RA cohort. To improve the diagnostic accuracy, we  
20 selected only those who had at least three outpatient visits for RA treatment or those patients  
21 who were admitted to the hospital with a primary diagnosis of RA during the study period.<sup>13</sup>  
22 The year when a patient was newly diagnosed with RA was defined as the index year.

23 For each case of RA, we randomly selected, from the remaining insured population  
24 without RA, four control subjects who were frequency matched to the RA case in terms of  
25

1 gender, age and index year. After the exclusion of subjects with a diagnosis of depression  
2 (ICD-9-CM 296.2, 296.3, 300.4 or 311) or stroke (ICD-9-CM 430-438) before the index date,  
3 a total of 8045 RA patients and 32600 non-RA subjects were included in the data analysis.  
4 Occurrence of stroke or depression was defined based on a criterion that indicated at least 3  
5 outpatient service claims, or at least 1 inpatient hospitalization claim, since 1996, when the  
6 computerized claims from the LHID became available, until the date of cohort entry.  
7 Thereafter, all subjects were followed up until the end of 2012 to measure the incidence of  
8 stroke. Only verified strokes that occurred one year following the first diagnosis of RA were  
9 included in order to render the temporal link between RA and stroke more plausible. We  
10 further stratified the RA cohort into two groups based on whether they were diagnosed with  
11 comorbid depression between the index date and the follow-up period. In accordance with the  
12 same rationale, the non-RA cohort was divided into two groups based on the existence (or no  
13 existence) of depression. Follow-up person-years (PYs) were calculated as the time interval  
14 from the entry date to the earliest occurrence of one of the following: a diagnosis of stroke,  
15 the date of withdrawal from insurance, or December 31, 2012, whichever came first.

### 17 **Demographic characteristics and comorbid conditions**

18 Demographic characteristics analyzed in this study included age, gender, monthly income,  
19 and level of urbanization of the subject's employment or residential area. Monthly income  
20 was grouped into 3 levels:  $\leq 17,880$  New Taiwan Dollars (NTD)\$, 17,881-43,900 NTD\$, and  
21  $\geq 43,901$ NTD\$. All 316 cities and townships in Taiwan were classified into 7 ordered levels  
22 of urbanization based on various indicators including population density, proportion of  
23 residents with college or higher education, percentage of elderly ( $> 65$  years of age) people,  
24 proportion of the workforce in agriculture, and number of physicians per  $10^5$  people.<sup>20</sup> Level  
25 1 refers to the "most urbanized" and level 7 refers to the "least urbanized" areas. The level of

1 urbanization was further divided into 3 strata: urban (levels 1-2), suburban (levels 3-4), and  
2 rural (levels 5-7) areas. Baseline comorbid conditions for each subject included hypertension  
3 (ICD-9-CM 401-405), diabetes (ICD-9-CM 250), heart disease (ICD-9-CM 410-429),  
4 chronic kidney disease (ICD-9-CM 585), tobacco use (ICD-9-CM 305.1), alcohol  
5 dependence syndrome (ICD-9-CM 303), and cancer (ICD-9-CM 140-208). The frequency of  
6 ambulatory care visits within the study period for each subject was considered to correct for  
7 surveillance bias.

### 9 **Statistical analysis**

10 Intergroup differences were evaluated using the independent-sample t-test or nonparametric  
11 Kolmogorov-Smirnov test for continuous variables, and the  $\chi^2$  test or Fisher exact test for  
12 categorical variables. The incidence rate of stroke in the four groups is presented as the  
13 number of cases per 1,000 PYs. To assess the risk of developing stroke across the four groups,  
14 Cox proportional hazards regression model was applied to compute the crude and adjusted  
15 hazard ratios (HRs) and the 95% confidence intervals (CI) for stroke among them. We also  
16 performed a sensitivity analysis to test the robustness of the findings using asthma, a disease  
17 not related to stroke, to replace depression. Finally, a multivariate Cox proportional hazards  
18 regression model was then used to identify risk factors that might be related to the incident of  
19 stroke and their adjusted HRs within RA cohorts. All analyses were conducted using SAS  
20 version 9.3 (SAS Institute Inc., Cary, NC, USA), and  $p < 0.05$  was considered statistically  
21 significant.

### 23 **RESULTS**

24 Table 1 shows the distribution of demographic data and comorbid medical disorders for the  
25 RA and non-RA cohorts. The RA cohorts were more likely to have a lower monthly income

( $p = 0.001$ ), reside in a rural area ( $p < 0.001$ ), have more visits seeking medical care ( $p < 0.001$ ), and suffer comorbid conditions including hypertension, diabetes, heart disease, chronic kidney disease or alcohol dependence syndrome (all  $p < 0.01$ ).

Of the total sample of 40,645 patients, 4550 had an incident stroke during the follow-up period. The crude and adjusted HRs for stroke in patients with depression only, RA only, and both, as a group, are shown in Table 2. Overall, after adjustment for potential confounders, relative to those with neither RA nor depression, subjects with RA and depression exhibited the highest risk of developing a stroke, with an adjusted HRs of 2.18 (95% CI = 1.87-2.54), followed by those with depression (adjusted HRs = 1.57, 95% CI = 1.41-1.75), and those with RA only (adjusted HRs = 1.43, 95% CI = 1.12-1.55).

Table 3 presents Cox regression model of factors related to the onset of stroke among individuals with RA. Compared to those without depression, those with depression were significantly more likely to develop a stroke (adjusted HRs = 1.63, 95% CI = 1.37-1.92) after adjustment for confounding factors. Results also showed that age was related to the risk of stroke. There was a 5% increase in the risk of stroke for each 1-year increment (95% CI = 1.03-1.08). Compared with females, males had an adjusted HRs of 1.17 for stroke (95% CI = 1.03-1.28). Additionally, some comorbid conditions including hypertension, heart disease and diabetes increased the risk of stroke with adjusted HRs of 1.51 (95% CI = 1.40-1.84), 1.48 (95% CI = 1.31-1.73) and 1.34 (95% CI = 1.16-1.56), respectively.

In the sensitivity analysis, we compared the risks of stroke across three groups: reference, RA only, and RA with asthma. We found that the RA with asthma group had an adjusted HR of 1.18 with a 95% CI of 0.89-1.34, which is not statistically significant. This indicates the validity of our methodology.

## DISCUSSION

Previous studies of the association between RA and the risk of stroke using

1 hospital/community-based populations yielded mixed findings.<sup>4 8 9 21</sup> It is noteworthy that  
2 these studies essentially ignored the effect of accompanying depressive symptoms, a common  
3 psychological problem among RA patients, on the relationship between the two diseases. To  
4 the best of our knowledge, this was the first population-based, nationwide study which  
5 attempted to determine if depression modified the association between RA and stroke, and  
6 could therefore help to facilitate the provision of more appropriate interventions to  
7 successfully manage rheumatological disorders and prevent the subsequent risk of  
8 cardiovascular diseases.

9 This 15-year follow-up study found that individuals with RA had a 43% greater-adjusted  
10 risk of stroke when compared with the general population. These findings are in agreement  
11 with the results of prior studies conducted in Western populations.<sup>8 9</sup> It has been argued that  
12 rheumatologic disorders are an overlapping group of conditions that are characterized by  
13 chronic inflammation involving connective tissues and organs.<sup>1 6 16</sup> Once inflammation occurs  
14 in the body, the vascular endothelial cells secrete proinflammatory cytokines, such as tumor  
15 necrosis factor-alpha (TNF- $\alpha$ ) or interleukin (IL)-6, which activate and attract massive  
16 numbers of white blood cells to the damaged region within the lumen of the vessel.  
17 Following infiltration into the tunica media, white blood cells absorb oxidized LDL-C and  
18 become foam cells, consequently accelerating the risk of thromboembolism.<sup>18</sup> In addition, a  
19 growing body of evidence has shown that inflammatory cytokines stimulate the production of  
20 matrix metalloproteinases (MMPs) as well, and this may cause further injury to  
21 the blood-brain barrier, thereby provoking a greater susceptibility to stroke.<sup>22 23</sup>

22 A noteworthy feature of the current study herein was that once patients with RA were  
23 diagnosed with comorbid depression during the treatment process, they exhibited more than  
24 double the likelihood of stroke than the general population. We speculate that there are  
25 several potential reasons as to why depression exacerbate the risk of stroke in these patients.



1  
2  
3 1 First, the presence of symptoms of depression is likely linked to treatment nonadherence and  
4  
5 2 an increase in unhealthy lifestyles, such as poor nutrition and physical inactivity, and these  
6  
7 3 may contribute to the development of a stroke.<sup>15</sup> Second, symptoms of depression can cause  
8  
9 4 systematic inflammation that worsens the manifestations of RA. Recent studies demonstrated  
10  
11 5 that depressed individuals with RA had higher circulating levels of inflammatory markers  
12  
13 6 such as IL-6, TNF- $\alpha$  and C-reactive protein (CRP)<sup>10</sup>; all of which play key roles in the  
14  
15 7 pathogenesis of stroke.<sup>18</sup> Additionally, recent research have focused on another signaling  
16  
17 8 pathway, namely, gut-to-brain communication, which suggested that intestinal dysfunction  
18  
19 9 induced by negative moods may cause the activation of immune cells and the production of  
20  
21 10 cytokines in the gut as well, thereby inducing the expression of inflammatory markers, which  
22  
23 11 in turn induce initiation and progression of neurological disorders.<sup>24 25</sup> It is also noteworthy  
24  
25 12 that only one in five patients with depression is estimated to have been treated and referred to  
26  
27 13 appropriate psychiatric services after the onset of RA.<sup>26</sup> The implementation of a  
28  
29 14 standardized psychosocial assessment, and of patient care procedures, as part of routine care  
30  
31 15 may therefore help in the early referral of high-risk patients for further therapeutic  
32  
33 16 interventions.

34  
35  
36  
37  
38 17 This study also indicated that males were at a 1.17-fold greater risk of stroke than females  
39  
40 18 in the RA cohorts. No previous study has examined gender differences in the risk of stroke  
41  
42 19 among patients with RA, which renders a comparison of results impossible. Nevertheless,  
43  
44 20 this is consistent with the observation that males have a higher risk of stroke than females  
45  
46 21 among the general population.<sup>27</sup> There are several possible explanations for this result. First,  
47  
48 22 women appear to have greater health consciousness with regard to stroke prevention than  
49  
50 23 men, and immediately seek medical therapy at the slightest irregularity in well-being, so the  
51  
52 24 onset of chronic diseases may be expected to be lower in women than in men.<sup>28</sup> Second,  
53  
54 25 lifetime exposure to ovarian estrogens may protect against the risk of stroke for females.  
55  
56  
57  
58  
59  
60

1  
2  
3 1 Extensive animal experiments and human studies have supported the function of estrogens as  
4  
5 2 neuroprotectants against neurodegenerative diseases, particularly stroke, through enhancing  
6  
7 3 basal release of Nitric Oxide (NO) to curb coronary thrombosis and atherosclerosis.<sup>27 29</sup>  
8  
9  
10 4 Recently, estrogenic agents have been suggested as a novel therapeutic approach to treat the  
11  
12 5 neuronal damages associated with global ischemia.<sup>27 30</sup>

13  
14 6 Consistent with the findings of prior studies conducted in the general population,<sup>16 27</sup> age  
15  
16 7 was positively correlated with the risk of stroke among patients with RA. We speculate that  
17  
18 8 with aging, blood vessels gradually lose elasticity and gain resistance, slowing the flow of  
19  
20 9 blood. Moreover, with poor circulation, fat is prone to accumulate in the abdomen and release  
21  
22 10 free fatty acids into the serum, leading to higher insulin resistance, elevated serum  
23  
24 11 triglycerides, and increased levels of LDL-C,<sup>31</sup> thereby resulting in the greater risk of stroke.

25  
26  
27 12 Findings of this study indicate that patients with RA and several comorbid conditions such  
28  
29 13 as hypertension, diabetes or heart disease had a significantly greater risk for stroke. Those  
30  
31 14 with chronic kidney disease and cancer showed a tendency for stroke, but the association  
32  
33 15 failed to reach statistical significance. Despite the lack of comparative studies on the effects  
34  
35 16 of comorbid conditions on stroke among patients with RA, our findings are consistent with  
36  
37 17 past arguments made in the literature.<sup>6</sup> The elevated risk of stroke may be attributed to  
38  
39 18 several causes. For example, insulin resistance and hypertension are common cardiovascular  
40  
41 19 risk factors among individuals with RA.<sup>32</sup> Moreover, the functional impairment induced by  
42  
43 20 comorbid conditions may lead to limited physical activity which could, very likely, trigger  
44  
45 21 additional risk of stroke. Finally, the immunosuppressive therapies used for patients with RA  
46  
47 22 have been found to have deleterious effects. Some review articles indicated that the use of  
48  
49 23 corticosteroids or non-steroidal anti-inflammatory drugs (NSAIDs) may be related to the risk  
50  
51 24 of cardiovascular events.<sup>6 18</sup> Before prescribing these drugs, rheumatologists should carefully  
52  
53 25 appraise the inherent cerebrovascular or cardiovascular risk among patients with RA.  
54  
55  
56  
57  
58  
59  
60

1  
2  
3 1 Several limitations of this study should be considered when interpreting these results. First,  
4  
5 2 we could not account for some potential confounding factors such as social networks, coping  
6  
7 3 modes, or educational level because these data were unavailable in the LHID. Future research  
8  
9 4 controlling for those untested variables is needed to better determine if the present findings  
10  
11 5 are replicated across diverse groups of individuals. Second, the identification of exposure and  
12  
13 6 outcome were based on the ICD-9-CM, and misclassification is inevitable. However, we  
14  
15 7 selected only those cases with RA, depression, or stroke after they were recorded as having  
16  
17 8 either at least three outpatient visits reporting consistent diagnoses, or one inpatient  
18  
19 9 admission. This approach is likely to minimize such errors. Furthermore, as the approach to  
20  
21 10 coding and the availability of data were similar regardless of the RA and depression status,  
22  
23 11 we believe the misclassification was likely to be random and thus, if indeed occurring, would  
24  
25 12 tend to draw the estimated HRs to the direction of the null values. Second, it should also be  
26  
27 13 noted that the NHI of Taiwan randomly samples claims from hospitals, interviews patients,  
28  
29 14 and reviews medical charts to verify the accuracy of medical records. Third, because data  
30  
31 15 regarding the severity of RA were unavailable in this databases. Nonetheless, the multivariate  
32  
33 16 analysis applied in this study considered the impact of several comorbid conditions including  
34  
35 17 hypertension, diabetes, heart disease, chronic kidney disease, tobacco use, alcohol  
36  
37 18 dependence syndrome and cancer. Furthermore, we performed a sensitivity analysis using on  
38  
39 19 those RA subjects without comorbid conditions to test the robustness of our findings and  
40  
41 20 found that depressed RA subjects with no known comorbid condition still had a higher risk of  
42  
43 21 stroke when compared to those without RA and depression, with an adjusted HR of 1.65  
44  
45 22 (95% CI = 1.23-2.03). Thus, the impact of disease severity is unlikely to compromise  
46  
47 23 findings of this study. Fourth, evidence derived from any observational cohort study is  
48  
49 24 generally less robust than that obtained from randomized control trials since cohort studies  
50  
51 25 are subject to various biases related to confounding effects. Despite our careful efforts to  
52  
53  
54  
55  
56  
57  
58  
59  
60

1  
2  
3 1 maintain adequate control of confounding factors, unpredictable biases could still remain if  
4  
5 2 they stem from unmeasured or unknown confounders. Notwithstanding these limitations, the  
6  
7 3 strengths of this study must also be acknowledged and these include the immediate  
8  
9 4 availability of data, the comprehensiveness of the database, and the statistical power derived  
10  
11 5 from the samples' large sizes. In addition, this retrospective 15-year cohort study allowed us  
12  
13 6 to clearly determine if the symptoms of depression exacerbated the risk of stroke for those  
14  
15 7 with RA, and the corresponding findings could serve as a reference for future treatment  
16  
17 8 strategies.

19  
20  
21 9 In conclusion, this study demonstrated that patients with RA and comorbid depression  
22  
23 10 were more than twice as likely to have a stroke than were those of the healthy controls. We  
24  
25 11 further found that the factors contributing to the high risk of stroke included being male, older,  
26  
27 12 as well as having depression and a comorbid condition such as hypertension, diabetes or heart  
28  
29 13 disease. Healthcare providers may, therefore, be able to better recognize those demographic  
30  
31 14 and diseases characteristics that contribute to the risk of stroke among patients with RA from  
32  
33 15 this population-based study. Findings also supported that the routine screening of depression  
34  
35 16 and the institution of patient-centered interventions may represent an important strategy for  
36  
37 17 improving clinical outcomes for RA patients.

38  
39  
40  
41  
42 18

#### 43 44 19 **Author affiliations**

45  
46 20 <sup>1</sup> Department of Medical Research, Dalin Tzuchi Hospital, The Buddhist Tzuchi Medical  
47  
48 21 Foundation, 2 Minsheng Road, Dalin Township, Chiayi 62247, Taiwan

49  
50 22 <sup>2</sup> Department of Environmental and Occupational Health, College of Medicine, National  
51  
52 23 Cheng Kung University, 138 Sheng-Li Road, Tainan 70428, Taiwan

53  
54 24 <sup>3</sup> Department of Nursing, Tzu Chi University of Science and Technology, 880 Chien-Kuo  
55  
56 25 Road Section 2, Hualien 62247, Taiwan

1  
2  
3 1 <sup>4</sup>Division of Allergy, Immunology and Rheumatology, Dalin Tzuchi Hospital, The Buddhist  
4  
5 2 Tzuchi Medical Foundation, 2 Minsheng Road, Dalin Township, Chiayi 62247, Taiwan

6  
7 3 <sup>5</sup>School of Medicine, Tzu Chi University, 701 Jhongyang Road Section 3, Hualien 97004,  
8  
9 4 Taiwan

10  
11 5 <sup>6</sup>Rehabilitation Counseling Program, Portland State University, Portland, OR 97207-0751,  
12  
13 6 USA

14  
15 7 <sup>7</sup>Department of Nursing, Dalin Tzuchi Hospital, The Buddhist Tzuchi Medical Foundation, 2  
16  
17 8 Minsheng Road, Dalin Township, Chiayi 62247, Taiwan

18  
19 9 <sup>8</sup>Department of Occupational and Environmental Medicine, National Cheng Kung University  
20  
21 10 Hospital, 138 Sheng-Li Road, Tainan 70428, Taiwan

22  
23 11 <sup>9</sup>Occupational Safety, Health, and Medicine Research Center, National Cheng Kung  
24  
25 12 University, 138 Sheng-Li Road, Tainan 70428, Taiwan

26  
27  
28  
29  
30  
31 13

32 14 **Acknowledgements** The study is based in part on data from the National Health Insurance  
33  
34 15 Research Database provided by the Bureau of National Health Insurance, Department of  
35  
36 16 Health and managed by National Health Research Institutes. The interpretation and  
37  
38 17 conclusions contained herein do not represent those of the Bureau of National Health  
39  
40 18 Insurance, Department of Health or National Health Research Institutes. This research was  
41  
42 19 supported by Dalin Tzuchi Hospital (Grant Number DTCRD103(2)-E-05). Lu MC, Chiu SY  
43  
44 20 and Guo HR contributed equally to this work.

45  
46  
47  
48 21

49  
50 22 **Contributors** All the authors approved the contents of the submitted article. Conceived and  
51  
52 23 designed the experiments: TTY CSY. Analyzed the data: TTY GHR. Contributed  
53  
54 24 reagents/materials/analysis tools: TTY LNS LMC GHR. Wrote the paper: TTY LH GHR.  
55  
56 25 Final approval of manuscript: TTY LNS LH CSY LMC GHR.

1  
2  
3  
4  
5  
6  
7  
8  
9  
10  
11  
12  
13  
14  
15  
16  
17  
18  
19  
20  
21  
22  
23  
24  
25  
26  
27  
28  
29  
30  
31  
32  
33  
34  
35  
36  
37  
38  
39  
40  
41  
42  
43  
44  
45  
46  
47  
48  
49  
50  
51  
52  
53  
54  
55  
56  
57  
58  
59  
60

1  
2  
3  
4  
5  
6  
7  
8  
9  
10  
11  
12  
13  
14  
15  
16  
17  
18  
19  
20  
21  
22  
23  
24  
25  
26  
27  
28  
29  
30  
31  
32  
33  
34  
35  
36  
37  
38  
39  
40  
41  
42  
43  
44  
45  
46  
47  
48  
49  
50  
51  
52  
53  
54  
55  
56  
57  
58  
59  
60

**Competing interests** The authors declare no competing financial interests.

**Ethics approval** This study was approved by the Research Ethics Committee of Dalin Tzuchi Hospital (No. B10004021-1).

**Data sharing statement** No additional data are available.

**Funding** The researcher received no specific grant form any funding agency in the public, commercial or not-for-profit sectors.

For peer review only

## References

- 1 Rindfleisch JA, Muller D. Diagnosis and management of rheumatoid arthritis. *Am Fam Physician* 2005;72:1037-47.
- 2 Birnbaum H, Pike C, Kaufman R, *et al.* Societal cost of rheumatoid arthritis patients in the US. *Cur Med Res Opin* 2010;26:77-90.
- 3 Lassere MN, Rappo J, Portek IJ, *et al.* How many life years are lost in patients with rheumatoid arthritis? Secular cause-specific and all-cause mortality in rheumatoid arthritis, and their predictors in a long-term Australian cohort study. *Intern Med J* 2013;43:66-72.
- 4 Lévy L, Fautrel B, Barnetche T, *et al.* Incidence and risk of fatal myocardial infarction and stroke events in rheumatoid arthritis patients. A systematic review of the literature. *Clin Exp Rheumatol* 2008;26:673-79.
- 5 Sokka T, Abelson B, Pincus T. Mortality in rheumatoid arthritis: 2008 update. *Clin Exp Rheumatol* 2008;26:S35-61.
- 6 Zha AM, Napoli M, Behrouz R. Prevention of stroke in rheumatoid arthritis. *Curr Neurol Neurosci Rep* 2015;15:1-10.
- 7 Farmer A, Korszun A, Owen MJ, *et al.* Medical disorders in people with recurrent depression. *Br J Psychiatry* 2008;192:351-5.
- 8 Meune C, Touzé E, Trinquart L, *et al.* High risk of clinical cardiovascular events in rheumatoid arthritis: levels of associations of myocardial infarction and stroke through a systematic review and meta-analysis. *Arch Cardiovasc Dis* 2010;103:253-61.
- 9 Lindhardsen J, Ahlehoff O, Gislason GH, *et al.* Risk of atrial fibrillation and stroke in rheumatoid arthritis: Danish nationwide cohort study. *BMJ* 2012;344:e1257.
- 10 Margaretten M, Julian L, Katz P, *et al.* Depression in patients with rheumatoid arthritis: description, causes and mechanisms. *Int J Clin Rheumatol* 2011;6:617-23.
- 11 Ang DC, Choi H, Kroenke K, *et al.* Comorbid depression is an independent risk factor for mortality in patients with rheumatoid arthritis. *J Rheumatol* 2005;32:1013-19.
- 12 Matcham F, Rayner L, Steer S, *et al.* The prevalence of depression in rheumatoid arthritis: a systematic review and meta-analysis. *Rheumatology (Oxford)* 2013;52:2136-48.
- 13 Lu M, Guo HR, Lin MC, *et al.* Bidirectional associations between rheumatoid arthritis and depression: a nationwide longitudinal study. *Sci Rep* 2016;6:20647.
- 14 Joyce AT, Smith P, Khandker R, *et al.* Hidden cost of rheumatoid arthritis (RA): estimating cost of comorbid cardiovascular disease and depression among patients with RA. *J Rheumatol* 2009;36:743-52.



- 1  
2  
3 1 15 Lee HC, Lin HC, Tsai SY. Severely depressed young patients have over five times  
4 2 increased risk for stroke: a 5-year follow-up study. *Biol Psychiatry* 2008;64:912-5.  
5 3 16 Behrouz R. The risk of ischemic stroke in major rheumatic disorders. *J Neuroimmunol*  
6 4 2014;277:1-5.  
7 5 17 Irwin MR, Davis M, Zautra A. Behavioral comorbidities in rheumatoid arthritis: a  
8 6 psychoneuroimmunological perspective. *Psychiatr Times* 2008;25:1.  
9 7 18 van den Oever IA, van Sijl AM, Nurmohamed MT. Management of cardiovascular  
10 8 risk in patients with rheumatoid arthritis: evidence and expert opinion. *Ther Adv*  
11 9 *Musculoskelet Dis* 2013;5:166-81.  
12 10 19 National Health Insurance Research Database, Taiwan.  
13 11 [http://nhird.nhri.org.tw/date\\_cohort.html](http://nhird.nhri.org.tw/date_cohort.html) (accessed 8 May 2015).  
14 12 20 Liu CY, Hung YT, Chuang YL, *et al.* Incorporating development stratification of  
15 13 Taiwan townships into sampling design of large scale health interview survey. *J*  
16 14 *Health Manag* 2006;4:1-22.  
17 15 21 Liou TH, Huang SW, Lin JW, *et al.* Risk of stroke in patients with rheumatism: a  
18 16 nationwide longitudinal population-based study. *Sci Rep* 2014;4: 5110.  
19 17 22 Lakhan SE, Kirchgessner A, Tepper D, *et al.* Matrix metalloproteinases and  
20 18 blood-brain barrier disruption in acute ischemic stroke. *Front Neurol* 2013;4:32.  
21 19 23 Yang Y, Rosenberg GA. Matrix metalloproteinases as therapeutic targets for stroke.  
22 20 *Brain Res* 2015;1623:30-8.  
23 21 24 Muscatello MR, Bruno A, Scimeca G, Pandolfo G, Zoccali RA. Role of negative  
24 22 affects in pathophysiology and clinical expression of irritable bowel syndrome. *World*  
25 23 *J Gastroenterol* 2014;20:7570-86.  
26 24 25 D'Mello C, Swain MG. Immune-to-brain communication pathways in  
27 25 inflammation-associated sickness and depression. *Curr Top Behav Neurosci* 2016  
28 26 [Epub ahead of print]  
29 27 26 Sleath B, Chewning B, de Vellis BM, *et al.* Communication about depression during  
30 28 rheumatoid arthritis patient visits. *Arthritis Rheum* 2008;59:186-91.  
31 29 27 Appelros P, Stegmayr B, Terént A. Sex differences in stroke epidemiology: a  
32 30 systematic review. *Stroke* 2009;40:1082-90.  
33 31 28 Stroebele N, Müller-Riemenschneider F, Nolte CH, *et al.* Knowledge of risk factors,  
34 32 and warning signs of stroke: a systematic review from a gender perspective. *Int J*  
35 33 *Stroke* 2011;6:60-6.  
36 34 29 Liu R, Yang SH. Window of opportunity: estrogen as a treatment for ischemic stroke.  
37 35 *Brain Res* 2013;1514:83-90.  
38 36 30 Etgen AM, Jover-Mengual T, Zukin RS. Neuroprotective actions of estradiol and  
39 37 novel estrogen analogs in ischemia: translational implications. *Front Neuroendocrinol*  
40 38 2011;32:336-52.

- 1  
2  
3 1 31 Ai M, Otokozawa S, Asztalos BF, *et al.* Small dense LDL cholesterol and coronary  
4 2 heart disease: results from the Framingham offspring study. *Clin Chem*  
5 3 2010;56:967-76.  
6 4 32 Liao KP, Solomon DH. Traditional cardiovascular risk factors, inflammation and  
7 5 cardiovascular risk in rheumatoid arthritis. *Rheumatology* 2013;52:45-52.  
8 6  
9 7  
10 8  
11 9  
12 10  
13 11  
14 12  
15 13  
16 14  
17 15  
18 16  
19 17  
20 18  
21 19  
22 20  
23 21  
24 22  
25 23  
26 24  
27 25  
28 26  
29  
30  
31  
32  
33  
34  
35  
36  
37  
38  
39  
40  
41  
42  
43  
44  
45  
46  
47  
48  
49  
50  
51  
52  
53  
54  
55  
56  
57  
58  
59  
60

1 **Table 1 Demographic data and comorbidity comparison of the study subjects.**

| Variables                                                            | Non-RA cohort<br>N = 32600 (%)   | RA cohort<br>N = 8045(%)         | P      |
|----------------------------------------------------------------------|----------------------------------|----------------------------------|--------|
| Age (years)                                                          |                                  |                                  | 0.85   |
| <=40                                                                 | 5378(16.5)                       | 1331(16.5)                       |        |
| 41-60                                                                | 15569(47.8)                      | 3814(47.4)                       |        |
| 60 <sup>+</sup>                                                      | 11653(35.7)                      | 2900(36.0)                       |        |
| Mean ± Standard Deviation (SD)                                       | 55.00±14.63                      | 55.01±14.65                      | 0.94   |
| Gender                                                               |                                  |                                  | 0.95   |
| Female                                                               | 22461(68.9)                      | 5540(68.9)                       |        |
| Male                                                                 | 10139(31.1)                      | 2505(31.1)                       |        |
| Monthly income                                                       |                                  |                                  | <0.001 |
| Low                                                                  | 15218(46.7)                      | 3513(43.7)                       |        |
| Median                                                               | 15985(49.0)                      | 4213(52.4)                       |        |
| High                                                                 | 1397(4.3)                        | 319(4.0)                         |        |
| Level of urbanization                                                |                                  |                                  | <0.001 |
| Urban                                                                | 18839(57.8)                      | 4485(55.7)                       |        |
| Suburban                                                             | 5311(16.3)                       | 1258(15.6)                       |        |
| Rural                                                                | 8450(25.9)                       | 2302(28.6)                       |        |
| Comorbidity                                                          |                                  |                                  |        |
| Hypertension                                                         | 5965(21.2)                       | 2216(27.6)                       | <0.001 |
| Diabetes                                                             | 2717(9.6)                        | 1046(13.0)                       | <0.001 |
| Heart disease                                                        | 3054(10.8)                       | 1273(15.8)                       | <0.001 |
| Chronic kidney disease                                               | 264(0.9)                         | 123(1.5)                         | <0.001 |
| Cancer                                                               | 959(3.4)                         | 268(3.3)                         | 0.75   |
| Alcohol dependence syndrome                                          | 30(0.1)                          | 18(0.2)                          | 0.002  |
| Tobacco use                                                          | 36(0.1)                          | 10(0.1)                          | 0.74   |
| Visits seeking medical care                                          |                                  |                                  |        |
| Mean ± SD (median, 25 <sup>th</sup> -75 <sup>th</sup><br>percentile) | 234.55 ± 194.08<br>(185, 97-319) | 159.90 ± 155.87<br>(114, 52-219) | <0.001 |

2

3

4

5

6

7

8

9

**Table 2 Crude and adjusted HRs of stroke for those with RA and comorbid depression, those with RA only, those with depression only as compared to those with neither RA nor depression.**

| Patient group                        | Event | PY        | Incidence | Crude HRs (95% CI) | Adjusted HRs * (95% CI) |
|--------------------------------------|-------|-----------|-----------|--------------------|-------------------------|
| <b>Non-RA cohort</b>                 |       |           |           |                    |                         |
| Neither RA nor depression (n=29,925) | 3063  | 245086.81 | 12.50     | 1.00               | 1.00                    |
| Depression only (n=2,675)            | 377   | 24540.32  | 15.36     | 1.23 (1.11-1.37)   | 1.57 (1.41-1.75)        |
| <b>RA cohort</b>                     |       |           |           |                    |                         |
| RA only (n=6,909)                    | 929   | 55223.83  | 16.82     | 1.35 (1.25-1.45)   | 1.43 (1.12-1.55)        |
| RA and depression (n=1,136)          | 181   | 9901.31   | 18.28     | 1.48 (1.26-1.71)   | 2.18 (1.87-2.54)        |

per 1,000 person-years for incidence rate.

\*Adjusted for age, gender, level of urbanization, income, visits seeking medical care, and comorbidity

1  
2  
3  
4 1  
5  
6 2 **Table 3 Multivariate analysis of factors for the incidence of stroke among patients with**  
7  
8 3 **RA.**

| Variables                   | Cox regression model (n=8045) |           |
|-----------------------------|-------------------------------|-----------|
|                             | Adjusted HRs*                 | 95% CI    |
| Depression                  |                               |           |
| No                          | 1                             |           |
| Yes                         | 1.63                          | 1.37-1.92 |
| Age                         | 1.05                          | 1.03-1.08 |
| Gender                      |                               |           |
| Female                      | 1                             |           |
| Male                        | 1.17                          | 1.03-1.28 |
| Monthly income              |                               |           |
| Low                         | 1                             |           |
| Median                      | 0.97                          | 0.85-1.10 |
| High                        | 0.85                          | 0.58-1.26 |
| Level of urbanization       |                               |           |
| Urban                       | 1                             |           |
| Suburban                    | 1.10                          | 0.92-1.30 |
| Rural                       | 1.06                          | 0.92-1.22 |
| Comorbidity                 |                               |           |
| Hypertension                |                               |           |
| No                          | 1                             |           |
| Yes                         | 1.51                          | 1.40-1.84 |
| Diabetes                    |                               |           |
| No                          | 1                             |           |
| Yes                         | 1.34                          | 1.16-1.56 |
| Heart disease               |                               |           |
| No                          | 1                             |           |
| Yes                         | 1.48                          | 1.31-1.73 |
| Chronic kidney disease      |                               |           |
| No                          | 1                             |           |
| Yes                         | 1.02                          | 0.76-1.30 |
| Cancer                      |                               |           |
| No                          | 1                             |           |
| Yes                         | 1.12                          | 0.84-1.47 |
| Visits seeking medical care | 0.99                          | 0.98-1.01 |

4 Adjusted for all variables in the model.

5

6

# BMJ Open

## Does depression increase the risk of stroke in patients with rheumatoid arthritis? A population-based cohort study

|                                 |                                                                                                                                                                                                                                                                                                                                                                                                                                                                                                                                                                                                                                                        |
|---------------------------------|--------------------------------------------------------------------------------------------------------------------------------------------------------------------------------------------------------------------------------------------------------------------------------------------------------------------------------------------------------------------------------------------------------------------------------------------------------------------------------------------------------------------------------------------------------------------------------------------------------------------------------------------------------|
| Journal:                        | <i>BMJ Open</i>                                                                                                                                                                                                                                                                                                                                                                                                                                                                                                                                                                                                                                        |
| Manuscript ID                   | bmjopen-2016-014233.R2                                                                                                                                                                                                                                                                                                                                                                                                                                                                                                                                                                                                                                 |
| Article Type:                   | Research                                                                                                                                                                                                                                                                                                                                                                                                                                                                                                                                                                                                                                               |
| Date Submitted by the Author:   | 07-Dec-2016                                                                                                                                                                                                                                                                                                                                                                                                                                                                                                                                                                                                                                            |
| Complete List of Authors:       | Tsai, Tzung-Yi; Buddhist Dalin Tzu Chi General Hospital, Department of Medical Research<br>Lu, Ming-Chi ; Dalin Tzuchi Hospital, The Buddhist Tzuchi Medical Foundation, Division of Allergy, Immunology and Rheumatology<br>Livneh, Hanoch ; Portland State University, Portland, OR 97207-0751, USA<br>Chiu, Shan-Yan ; Dalin Tzuchi Hospital, The Buddhist Tzuchi Medical Foundation, Department of Nursing<br>Lai, Ning-Sheng; Buddhist Dalin Tzu Chi General Hospital, Division of Allergy, Immunology and Rheumatology<br>Guo, How-Ran; National Cheng Kung University, Department of Environmental and Occupational Health, College of Medicine |
| <b>Primary Subject Heading</b>: | Rheumatology                                                                                                                                                                                                                                                                                                                                                                                                                                                                                                                                                                                                                                           |
| Secondary Subject Heading:      | Rheumatology, Mental health, Neurology                                                                                                                                                                                                                                                                                                                                                                                                                                                                                                                                                                                                                 |
| Keywords:                       | rheumatoid arthritis, Depression & mood disorders < PSYCHIATRY, Stroke < NEUROLOGY, cohort study                                                                                                                                                                                                                                                                                                                                                                                                                                                                                                                                                       |
|                                 |                                                                                                                                                                                                                                                                                                                                                                                                                                                                                                                                                                                                                                                        |

SCHOLARONE™  
Manuscripts

only

1  
2  
3  
4  
5  
6  
7  
8  
9  
10  
11  
12  
13  
14  
15  
16  
17  
18  
19  
20  
21  
22  
23  
24  
25  
26  
27  
28  
29  
30  
31  
32  
33  
34  
35  
36  
37  
38  
39  
40  
41  
42  
43  
44  
45  
46  
47  
48  
49  
50  
51  
52  
53  
54  
55  
56  
57  
58  
59  
60

1 **Does depression increase the risk of stroke in patients with rheumatoid arthritis? A**  
2 **population-based cohort study**

3  
4 Tzung-Yi Tsai<sup>1,2,3</sup>, Ming-Chi Lu<sup>4,5</sup>, Hanoch Livneh<sup>6</sup>, Shan-Yun Chiu<sup>7</sup>, Ning-Sheng Lai<sup>4,5</sup>,  
5 How-Ran Guo<sup>2,8,9\*</sup>

6  
7 <sup>1</sup> Department of Medical Research, Dalin Tzuchi Hospital, The Buddhist Tzuchi Medical  
8 Foundation, 2 Minsheng Road, Dalin Township, Chiayi 62247, Taiwan

9 <sup>2</sup> Department of Environmental and Occupational Health, College of Medicine, National  
10 Cheng Kung University, 138 Sheng-Li Road, Tainan 70428, Taiwan

11 <sup>3</sup> Department of Nursing, Tzu Chi University of Science and Technology, 880 Chien-Kuo  
12 Road Section 2, Hualien 62247, Taiwan

13 <sup>4</sup> Division of Allergy, Immunology and Rheumatology, Dalin Tzuchi Hospital, The Buddhist  
14 Tzuchi Medical Foundation, 2 Minsheng Road, Dalin Township, Chiayi 62247, Taiwan

15 <sup>5</sup> School of Medicine, Tzu Chi University, 701 Jhongyang Road Section 3, Hualien 97004,  
16 Taiwan

17 <sup>6</sup> Rehabilitation Counseling Program, Portland State University, Portland, OR 97207-0751,  
18 USA

19 <sup>7</sup> Department of Nursing, Dalin Tzuchi Hospital, The Buddhist Tzuchi Medical Foundation, 2  
20 Minsheng Road, Dalin Township, Chiayi 62247, Taiwan

21 <sup>8</sup> Department of Occupational and Environmental Medicine, National Cheng Kung University  
22 Hospital, 138 Sheng-Li Road, Tainan 70428, Taiwan

23 <sup>9</sup> Occupational Safety, Health, and Medicine Research Center, National Cheng Kung  
24 University, 138 Sheng-Li Road, Tainan 70428, Taiwan

25



1 Correspondence and requests for materials should be addressed to Guo HR.

2 Email: dm732024@tzuchi.com.tw or hrguo@mail.ncku.edu.tw

3 TEL: 886-6-2353535 ext. 5802

4 FAX: 886-6-2752484

5

6

7

8

9

10

11

12

13

14

15

16

17

18

19

20

1  
2  
3 1 **ABSTRACT**

4  
5 2 **Objectives:** Comorbid depression is common and undertreated in patients with rheumatoid  
6  
7 3 arthritis (RA). It remains uncertain whether comorbid depression provoked the risk of poor  
8  
9 4 clinical outcome, stroke in particular, among RA patients. This work aimed to determine if  
10  
11 5 depression onset during the treatment process increases stroke risk for patients with RA as  
12  
13 6 compared to those with (a) neither RA nor depression, (b) RA only, and (c) depression only.

14  
15  
16 7 **Design:** A nationwide, population-based cohort study.

17  
18 8 **Setting:** Taiwan's Longitudinal Health Insurance Database.

19  
20  
21 9 **Participants:** We identified 8,045 subjects with a newly diagnosed RA between 1997 and  
22  
23 10 2010, together with 32,600 subjects without RA matched by age, gender and index date. All  
24  
25 11 subjects were further divided into four groups based on whether they were diagnosed with  
26  
27 12 comorbid depression during the follow-up period.

28  
29  
30 13 **Main outcome measure:** The incidence rate and hazard ratio for incident stroke were  
31  
32 14 estimated by the end of 2012 using Cox proportional-hazard regression.

33  
34 15 **Results:** We discovered that RA patients with the comorbid depression exhibited the highest  
35  
36 16 risk of stroke, with an adjusted hazard ratios (HRs) of 2.18 (95% confidence interval =  
37  
38 17 1.87-2.54). Those with RA only or those with depression only still had the higher risk of  
39  
40 18 stroke by 43% and 57% as compared with subjects without either condition. Multivariate  
41  
42 19 analysis showed RA subjects who were male or older, incurred the onset of depression, or had  
43  
44 20 comorbidities such as hypertension, diabetes as well as heart disease had a greater risk of  
45  
46 21 stroke.

47  
48  
49 22 **Conclusions:** This study cleared up the significant association between RA and the  
50  
51 23 subsequent risk of stroke, and further highlighted that the onset of depression within the  
52  
53 24 treatment process may increase stroke risk for RA subjects. Findings could assist healthcare  
54  
55 25 providers to pinpoint RA individuals with a higher predisposition of stroke, which could

1 facilitate the provision of appropriate rehabilitation.

2 **Keywords** : rheumatoid arthritis, depression, stroke, cohort study

3  
4  
5 **Strengths and limitations of this study**

6 ● The main outcome measures employed in this work are validated due to the application  
7 of population-based cohort study, based on a nationwide claim database, thus decreasing  
8 recall and selection bias.

9 ● This is the first report to clarify the effect of comorbid depression on the stroke risk  
10 among RA subjects, which was beneficial for healthcare providers in guiding more  
11 effective treatment strategies to improve the clinical outcomes for them.

12 ● Misclassification of diseases and failure to adjust for disease severity might lead to  
13 somewhat skewed findings

## 1 INTRODUCTION

2 Rheumatoid arthritis (RA) is a systemic autoimmune disease manifested as long-term joint  
3 damage, chronic debilitating pain, and premature mortality. This disease often affects people  
4 30 to 50 years of age and results in disability and inability to work, thus posing a heavy  
5 burden on patients with RA, their families and the healthcare system.<sup>1</sup> A review of the  
6 financial burdens of RA in the United States showed that the annual direct medical costs of  
7 RA reached about \$9 billion, and the total societal costs (the sum of direct and indirect costs)  
8 was estimated to exceed \$39 billion.<sup>2</sup>

9 Despite improvements in the diagnosis and treatment of RA, patients with RA still have a  
10 lower life expectancy (6-7 years) when compared with the general population.<sup>3</sup> This  
11 increased mortality is due primarily to cardiovascular diseases such as myocardial infarction  
12 (MI) or stroke.<sup>4-6</sup> Nevertheless, unlike the studies of RA predicting the onset of MI,<sup>4 7 8</sup>  
13 evidence for an association between RA and the development of stroke remains conflicting. A  
14 meta-analysis of 15 articles indicated that individuals with RA had a 63% higher risk for MI,  
15 but not for stroke [odds ratio (OR)= 1.14, 95% confidence interval (CI) = 0.86-1.51] when  
16 compared to the general population.<sup>4</sup> On the other hand, a recent Danish study involving  
17 18,247 patients with RA, who were followed for a median of 4.8 years, indicated that those  
18 with RA had a 30% higher risk of stroke than a non-RA group.<sup>9</sup> Another meta-analysis of 17  
19 studies reported that patients with RA had a higher predisposition to develop stroke than did  
20 non-RA subjects, with a pool risk of 1.91.<sup>8</sup>

21 One cause for concern is that the former studies did not consider the effect of  
22 accompanying psychological factors on the risk of stroke; depression, in particular, which is  
23 often underdiagnosed and undertreated.<sup>10</sup> Depression, a well-documented comorbidity among  
24 people with chronic diseases, specifically arthritis, may exacerbate functional disabilities,  
25 affect adherence to treatment, and be a barrier to self-care and self-management behaviors.<sup>11</sup>

1 A recent meta-analysis estimated that the prevalence of depression among patients with RA  
2 ranges from 14.8 to 38.8%,<sup>12</sup> and findings from our previous study indicated that RA patients  
3 were nearly twice as likely to experience depression as the general population.<sup>13</sup> Indeed, once  
4 patients with RA suffered from concomitant depression, they had a 7.2% increase in medical  
5 costs (\$12,225 vs. \$11,404),<sup>14</sup> and their likelihood of mortality more than doubled.<sup>11</sup> Given  
6 the alarming rate of depression and the corresponding physical burden on patients with RA, it  
7 is imperative to implement effective therapeutic interventions to achieve more favorable  
8 therapeutic outcomes, thus serving to extend the life expectancy of patients with RA. Notably,  
9 based on former research, the activation of innate inflammatory mechanisms that accompany  
10 depressive mood was assumed to affect the susceptibility to development of cardiovascular  
11 diseases in addition to the influence of behavioral factors,<sup>15-18</sup> implying that the causative  
12 role of depression should not be neglected as determining the association of RA with stroke.

13 With this growing evidence on the association between RA and subsequent risk of stroke,  
14 and the limited information on whether depression serves as a potential factor that affects the  
15 relationship between these two conditions, findings from a long-term population-based  
16 nationwide study could be useful in allocating medical resources and in instituting fact-based  
17 policymaking. Nevertheless, to date, no clinical observations or empirical data have  
18 documented this concern. The aim of this cohort study, therefore, was to determine if RA  
19 patients with the comorbid depression were at an increased risk for stroke as compared to  
20 those with (a) neither RA nor depression, (b) RA only, and (c) depression only, using claims  
21 data from the National Health Insurance (NHI) of Taiwan.

22

## 23 **METHODS**

### 24 **Data sources**

25 The data analyzed in this cohort study were retrieved from the Longitudinal Health Insurance

1 Database (LHID), maintained by the Bureau of NHI (BNHI) and provided to scientists in  
2 Taiwan for research purposes. Taiwan launched a single-payer NHI Program in 1995 in order  
3 to remove financial barriers to medical care for all legal residents. At the end of 2010, more  
4 than 99% of Taiwan's population had enrolled in this program.<sup>19</sup> The LHID is a subset of the  
5 NHI database, and contains comprehensive utilization and enrollment information for one  
6 million randomly selected NHI beneficiaries, representing 5% of all enrollees in Taiwan in  
7 2000. Because a multistage stratified systematic sampling method was used for this study,  
8 there were no statistically significant differences regarding gender or age between the  
9 sampled group and the total number of enrollees.<sup>19</sup> This study complied with the guidelines  
10 of the Declaration of Helsinki and was approved by the local institutional review board and  
11 ethics committee of Buddhist Dalin Tzu Chi Hospital, Taiwan (No. B10004021-1). As the  
12 LHID data files contained only de-identified secondary data, the need for informed consent  
13 from individual patient consent was waived by the institutional review board.

### 14 **Study subjects**

15 Diagnoses in the insurance claims data were coded according to the International  
16 Classification of Disease, 9th Revision, Clinical Modification (ICD-9-CM). The LHID  
17 records were used to identify patients with RA in the age bracket 20-to-90 years of age, and  
18 newly diagnosed patients between 1997 and 2010. Those who were diagnosed with an  
19 ICD-9-CM code of 714.0 comprised the RA cohort. To improve the diagnostic accuracy, we  
20 selected only those who had at least three outpatient visits for RA treatment or those patients  
21 who were admitted to the hospital with a primary diagnosis of RA during the study period.<sup>13</sup>  
22 The year when a patient was newly diagnosed with RA was defined as the index year.

23 For each case of RA, we randomly selected, from the remaining insured population  
24 without RA, four control subjects who were frequency matched to the RA case in terms of  
25

1 gender, age and index year. After the exclusion of subjects with a diagnosis of depression  
2 (ICD-9-CM 296.2, 296.3, 300.4 or 311) or stroke (ICD-9-CM 430-438) before the index date,  
3 a total of 8045 RA patients and 32600 non-RA subjects were included in the data analysis.  
4 Occurrence of stroke or depression was defined based on a criterion that indicated at least 3  
5 outpatient service claims, or at least 1 inpatient hospitalization claim, since 1996, when the  
6 computerized claims from the LHID became available, until the date of cohort entry.  
7 Thereafter, all subjects were followed up until the end of 2012 to measure the incidence of  
8 stroke. Only verified strokes that occurred one year following the first diagnosis of RA were  
9 included in order to render the temporal link between RA and stroke more plausible. We  
10 further stratified the RA cohort into two groups based on whether they were diagnosed with  
11 comorbid depression between the index date and the follow-up period. In accordance with the  
12 same rationale, the non-RA cohort was divided into two groups based on the existence (or no  
13 existence) of depression. Follow-up person-years (PYs) were calculated as the time interval  
14 from the entry date to the earliest occurrence of one of the following: a diagnosis of stroke,  
15 the date of withdrawal from insurance, or December 31, 2012, whichever came first.

### 17 **Demographic characteristics and comorbid conditions**

18 Demographic characteristics analyzed in this study included age, gender, monthly income,  
19 and level of urbanization of the subject's employment or residential area. Monthly income  
20 was grouped into 3 levels:  $\leq 17,880$  New Taiwan Dollars (NTD)\$, 17,881-43,900 NTD\$, and  
21  $\geq 43,901$ NTD\$. All 316 cities and townships in Taiwan were classified into 7 ordered levels  
22 of urbanization based on various indicators including population density, proportion of  
23 residents with college or higher education, percentage of elderly ( $> 65$  years of age) people,  
24 proportion of the workforce in agriculture, and number of physicians per  $10^5$  people.<sup>20</sup> Level  
25 1 refers to the "most urbanized" and level 7 refers to the "least urbanized" areas. The level of



1 urbanization was further divided into 3 strata: urban (levels 1-2), suburban (levels 3-4), and  
2 rural (levels 5-7) areas. Baseline comorbid conditions for each subject included hypertension  
3 (ICD-9-CM 401-405), diabetes (ICD-9-CM 250), heart disease (ICD-9-CM 410-429),  
4 chronic kidney disease (ICD-9-CM 585), tobacco use (ICD-9-CM 305.1), alcohol  
5 dependence syndrome (ICD-9-CM 303), and cancer (ICD-9-CM 140-208). The frequency of  
6 ambulatory care visits within the study period for each subject was considered to correct for  
7 surveillance bias.

### 9 **Statistical analysis**

10 Intergroup differences were evaluated using the independent-sample t-test or nonparametric  
11 Kolmogorov-Smirnov test for continuous variables, and the  $\chi^2$  test or Fisher exact test for  
12 categorical variables. The incidence rate of stroke in the four groups is presented as the  
13 number of cases per 1,000 PYs. To assess the risk of developing stroke across the four groups,  
14 Cox proportional hazards regression model was applied to compute the crude and adjusted  
15 hazard ratios (HRs) and the 95% confidence intervals (CI) for stroke among them. We also  
16 performed a sensitivity analysis to test the robustness of the findings using asthma, a disease  
17 not related to stroke, to replace depression. Finally, a multivariate Cox proportional hazards  
18 regression model was then used to identify risk factors that might be related to the incident of  
19 stroke and their adjusted HRs within RA cohorts. All analyses were conducted using SAS  
20 version 9.3 (SAS Institute Inc., Cary, NC, USA), and  $p < 0.05$  was considered statistically  
21 significant.

### 23 **RESULTS**

24 Table 1 shows the distribution of demographic data and comorbid medical disorders for the  
25 RA and non-RA cohorts. The RA cohorts were more likely to have a lower monthly income

1 (p = 0.001), reside in a rural area (p < 0.001), have more visits seeking medical care (p <  
2 0.001), and suffer comorbid conditions including hypertension, diabetes, heart disease,  
3 chronic kidney disease or alcohol dependence syndrome (all p < 0.01).

4 Of the total sample of 40,645 patients, 4550 had an incident stroke during the follow-up  
5 period. The crude and adjusted HRs for stroke in patients with depression only, RA only, and  
6 both, as a group, are shown in Table 2. Overall, after adjustment for potential confounders,  
7 relative to those with neither RA nor depression, subjects with RA and depression exhibited  
8 the highest risk of developing a stroke, with an adjusted HRs of 2.18 (95% CI = 1.87-2.54),  
9 followed by those with depression (adjusted HRs = 1.57, 95% CI = 1.41-1.75), and those  
10 with RA only (adjusted HRs = 1.43, 95% CI = 1.12-1.55).

11 Table 3 presents Cox regression model of factors related to the onset of stroke among  
12 individuals with RA. Compared to those without depression, those with depression were  
13 significantly more likely to develop a stroke (adjusted HRs = 1.63, 95% CI = 1.37-1.92) after  
14 adjustment for confounding factors. Results also showed that age was related to the risk of  
15 stroke. There was a 5% increase in the risk of stroke for each 1-year increment (95% CI =  
16 1.03-1.08). Compared with females, males had an adjusted HRs of 1.17 for stroke (95% CI =  
17 1.03-1.28). Additionally, some comorbid conditions including hypertension, heart disease and  
18 diabetes increased the risk of stroke with adjusted HRs of 1.51 (95% CI = 1.40-1.84), 1.48  
19 (95% CI = 1.31-1.73) and 1.34 (95% CI = 1.16-1.56), respectively.

20 In the sensitivity analysis, we compared the risks of stroke across three groups: reference,  
21 RA only, and RA with asthma. We found that the RA with asthma group had an adjusted HR  
22 of 1.18 with a 95% CI of 0.89-1.34, which is not statistically significant. This indicates the  
23 validity of our methodology.

## 24 25 **DISCUSSION**

26 Previous studies of the association between RA and the risk of stroke using

1 hospital/community-based populations yielded mixed findings.<sup>4 8 9 21</sup> It is noteworthy that  
2 these studies essentially ignored the effect of accompanying depressive symptoms, a common  
3 psychological problem among RA patients, on the relationship between the two diseases. To  
4 the best of our knowledge, this was the first population-based, nationwide study which  
5 attempted to determine if depression modified the association between RA and stroke, and  
6 could therefore help to facilitate the provision of more appropriate interventions to  
7 successfully manage rheumatological disorders and prevent the subsequent risk of  
8 cardiovascular diseases.

9 This 15-year follow-up study found that individuals with RA had a 43% greater-adjusted  
10 risk of stroke when compared with the general population. These findings are in agreement  
11 with the results of prior studies conducted in Western populations.<sup>8 9</sup> It has been argued that  
12 rheumatologic disorders are an overlapping group of conditions that are characterized by  
13 chronic inflammation involving connective tissues and organs.<sup>1 6 16</sup> Once inflammation occurs  
14 in the body, the vascular endothelial cells secrete proinflammatory cytokines, such as tumor  
15 necrosis factor-alpha (TNF- $\alpha$ ) or interleukin (IL)-6, which activate and attract massive  
16 numbers of white blood cells to the damaged region within the lumen of the vessel.  
17 Following infiltration into the tunica media, white blood cells absorb oxidized LDL-C and  
18 become foam cells, consequently accelerating the risk of thromboembolism.<sup>18</sup> In addition, a  
19 growing body of evidence has shown that inflammatory cytokines stimulate the production of  
20 matrix metalloproteinases (MMPs) as well, and this may cause further injury to  
21 the blood-brain barrier, thereby provoking a greater susceptibility to stroke.<sup>22 23</sup>

22 A noteworthy feature of the current study herein was that once patients with RA were  
23 diagnosed with comorbid depression during the treatment process, they exhibited more than  
24 double the likelihood of stroke than the general population. We speculate that there are  
25 several potential reasons as to why depression exacerbate the risk of stroke in these patients.

1  
2  
3 1 First, the presence of symptoms of depression is likely linked to treatment nonadherence and  
4  
5 2 an increase in unhealthy lifestyles, such as poor nutrition and physical inactivity, and these  
6  
7 3 may contribute to the development of a stroke.<sup>15</sup> Second, symptoms of depression can cause  
8  
9 4 systematic inflammation that worsens the manifestations of RA. Recent studies demonstrated  
10  
11 5 that depressed individuals with RA had higher circulating levels of inflammatory markers  
12  
13 6 such as IL-6, TNF- $\alpha$  and C-reactive protein (CRP)<sup>10</sup>; all of which play key roles in the  
14  
15 7 pathogenesis of stroke.<sup>18</sup> Additionally, recent research have focused on another signaling  
16  
17 8 pathway, namely, gut-to-brain communication, which suggested that intestinal dysfunction  
18  
19 9 induced by negative moods may cause the activation of immune cells and the production of  
20  
21 10 cytokines in the gut as well, thereby inducing the expression of inflammatory markers, which  
22  
23 11 in turn induce initiation and progression of neurological disorders.<sup>24 25</sup> It is also noteworthy  
24  
25 12 that only one in five patients with depression is estimated to have been treated and referred to  
26  
27 13 appropriate psychiatric services after the onset of RA.<sup>26</sup> The implementation of a  
28  
29 14 standardized psychosocial assessment, and of patient care procedures, as part of routine care  
30  
31 15 may therefore help in the early referral of high-risk patients for further therapeutic  
32  
33 16 interventions.

34  
35  
36  
37  
38 17 This study also indicated that males were at a 1.17-fold greater risk of stroke than females  
39  
40 18 in the RA cohorts. No previous study has examined gender differences in the risk of stroke  
41  
42 19 among patients with RA, which renders a comparison of results impossible. Nevertheless,  
43  
44 20 this is consistent with the observation that males have a higher risk of stroke than females  
45  
46 21 among the general population.<sup>27</sup> There are several possible explanations for this result. First,  
47  
48 22 women appear to have greater health consciousness with regard to stroke prevention than  
49  
50 23 men, and immediately seek medical therapy at the slightest irregularity in well-being, so the  
51  
52 24 onset of chronic diseases may be expected to be lower in women than in men.<sup>28</sup> Second,  
53  
54 25 lifetime exposure to ovarian estrogens may protect against the risk of stroke for females.  
55  
56  
57  
58  
59  
60

1  
2  
3 1 Extensive animal experiments and human studies have supported the function of estrogens as  
4  
5 2 neuroprotectants against neurodegenerative diseases, particularly stroke, through enhancing  
6  
7 3 basal release of Nitric Oxide (NO) to curb coronary thrombosis and atherosclerosis.<sup>27 29</sup>  
8  
9  
10 4 Recently, estrogenic agents have been suggested as a novel therapeutic approach to treat the  
11  
12 5 neuronal damages associated with global ischemia.<sup>27 30</sup>

13  
14 6 Consistent with the findings of prior studies conducted in the general population,<sup>16 27</sup> age  
15  
16 7 was positively correlated with the risk of stroke among patients with RA. We speculate that  
17  
18 8 with aging, blood vessels gradually lose elasticity and gain resistance, slowing the flow of  
19  
20 9 blood. Moreover, with poor circulation, fat is prone to accumulate in the abdomen and release  
21  
22 10 free fatty acids into the serum, leading to higher insulin resistance, elevated serum  
23  
24 11 triglycerides, and increased levels of LDL-C,<sup>31</sup> thereby resulting in the greater risk of stroke.

25  
26  
27 12 Findings of this study indicate that patients with RA and several comorbid conditions such  
28  
29 13 as hypertension, diabetes or heart disease had a significantly greater risk for stroke. Those  
30  
31 14 with chronic kidney disease and cancer showed a tendency for stroke, but the association  
32  
33 15 failed to reach statistical significance. Despite the lack of comparative studies on the effects  
34  
35 16 of comorbid conditions on stroke among patients with RA, our findings are consistent with  
36  
37 17 past arguments made in the literature.<sup>6</sup> The elevated risk of stroke may be attributed to  
38  
39 18 several causes. For example, insulin resistance and hypertension are common cardiovascular  
40  
41 19 risk factors among individuals with RA.<sup>32</sup> Moreover, the functional impairment induced by  
42  
43 20 comorbid conditions may lead to limited physical activity which could, very likely, trigger  
44  
45 21 additional risk of stroke. Finally, the immunosuppressive therapies used for patients with RA  
46  
47 22 have been found to have deleterious effects. Some review articles indicated that the use of  
48  
49 23 corticosteroids or non-steroidal anti-inflammatory drugs (NSAIDs) may be related to the risk  
50  
51 24 of cardiovascular events.<sup>6 18</sup> Before prescribing these drugs, rheumatologists should carefully  
52  
53 25 appraise the inherent cerebrovascular or cardiovascular risk among patients with RA.  
54  
55  
56  
57  
58  
59  
60

1  
2  
3 1 Several limitations of this study should be considered when interpreting these results. First,  
4  
5 2 we could not account for some potential confounding factors such as social networks, coping  
6  
7 3 modes, or educational level because these data were unavailable in the LHID. Future research  
8  
9 4 controlling for those untested variables is needed to better determine if the present findings  
10  
11 5 are replicated across diverse groups of individuals. Second, the identification of exposure and  
12  
13 6 outcome were based on the ICD-9-CM, and misclassification is inevitable. However, we  
14  
15 7 selected only those cases with RA, depression, or stroke after they were recorded as having  
16  
17 8 either at least three outpatient visits reporting consistent diagnoses, or one inpatient  
18  
19 9 admission. This approach is likely to minimize such errors. Furthermore, as the approach to  
20  
21 10 coding and the availability of data were similar regardless of the RA and depression status,  
22  
23 11 we believe the misclassification was likely to be random and thus, if indeed occurring, would  
24  
25 12 tend to draw the estimated HRs to the direction of the null values. Second, it should also be  
26  
27 13 noted that the NHI of Taiwan randomly samples claims from hospitals, interviews patients,  
28  
29 14 and reviews medical charts to verify the accuracy of medical records. Third, because data  
30  
31 15 regarding the severity of RA were unavailable in this databases. Nonetheless, the multivariate  
32  
33 16 analysis applied in this study considered the impact of several comorbid conditions including  
34  
35 17 hypertension, diabetes, heart disease, chronic kidney disease, tobacco use, alcohol  
36  
37 18 dependence syndrome and cancer. Furthermore, we performed a sensitivity analysis using on  
38  
39 19 those RA subjects without comorbid conditions to test the robustness of our findings and  
40  
41 20 found that depressed RA subjects with no known comorbid condition still had a higher risk of  
42  
43 21 stroke when compared to those without RA and depression, with an adjusted HR of 1.65  
44  
45 22 (95% CI = 1.23-2.03). Thus, the impact of disease severity is unlikely to compromise  
46  
47 23 findings of this study. Fourth, evidence derived from any observational cohort study is  
48  
49 24 generally less robust than that obtained from randomized control trials since cohort studies  
50  
51 25 are subject to various biases related to confounding effects. Despite our careful efforts to  
52  
53  
54  
55  
56  
57  
58  
59  
60

1  
2  
3 1 maintain adequate control of confounding factors, unpredictable biases could still remain if  
4  
5 2 they stem from unmeasured or unknown confounders. Notwithstanding these limitations, the  
6  
7 3 strengths of this study must also be acknowledged and these include the immediate  
8  
9 4 availability of data, the comprehensiveness of the database, and the statistical power derived  
10  
11 5 from the samples' large sizes. In addition, this retrospective 15-year cohort study allowed us  
12  
13 6 to clearly determine if the symptoms of depression exacerbated the risk of stroke for those  
14  
15 7 with RA, and the corresponding findings could serve as a reference for future treatment  
16  
17 8 strategies.

19  
20  
21 9 In conclusion, this study demonstrated that patients with RA and comorbid depression  
22  
23 10 were more than twice as likely to have a stroke than were those of the healthy controls. We  
24  
25 11 further found that the factors contributing to the high risk of stroke included being male, older,  
26  
27 12 as well as having depression and a comorbid condition such as hypertension, diabetes or heart  
28  
29 13 disease. Healthcare providers may, therefore, be able to better recognize those demographic  
30  
31 14 and diseases characteristics that contribute to the risk of stroke among patients with RA from  
32  
33 15 this population-based study. Findings also supported that the routine screening of depression  
34  
35 16 and the institution of patient-centered interventions may represent an important strategy for  
36  
37 17 improving clinical outcomes for RA patients.

38  
39  
40  
41 18

#### 42 43 44 19 **Author affiliations**

45  
46 20 <sup>1</sup> Department of Medical Research, Dalin Tzuchi Hospital, The Buddhist Tzuchi Medical  
47  
48 21 Foundation, 2 Minsheng Road, Dalin Township, Chiayi 62247, Taiwan

49  
50 22 <sup>2</sup> Department of Environmental and Occupational Health, College of Medicine, National  
51  
52 23 Cheng Kung University, 138 Sheng-Li Road, Tainan 70428, Taiwan

53  
54 24 <sup>3</sup> Department of Nursing, Tzu Chi University of Science and Technology, 880 Chien-Kuo  
55  
56 25 Road Section 2, Hualien 62247, Taiwan



1  
2  
3 1 <sup>4</sup>Division of Allergy, Immunology and Rheumatology, Dalin Tzuchi Hospital, The Buddhist  
4  
5 2 Tzuchi Medical Foundation, 2 Minsheng Road, Dalin Township, Chiayi 62247, Taiwan

6  
7 3 <sup>5</sup>School of Medicine, Tzu Chi University, 701 Jhongyang Road Section 3, Hualien 97004,  
8  
9 4 Taiwan

10  
11 5 <sup>6</sup>Rehabilitation Counseling Program, Portland State University, Portland, OR 97207-0751,  
12  
13 6 USA

14  
15  
16 7 <sup>7</sup>Department of Nursing, Dalin Tzuchi Hospital, The Buddhist Tzuchi Medical Foundation, 2  
17  
18 8 Minsheng Road, Dalin Township, Chiayi 62247, Taiwan

19  
20  
21 9 <sup>8</sup>Department of Occupational and Environmental Medicine, National Cheng Kung University  
22  
23 10 Hospital, 138 Sheng-Li Road, Tainan 70428, Taiwan

24  
25 11 <sup>9</sup>Occupational Safety, Health, and Medicine Research Center, National Cheng Kung  
26  
27 12 University, 138 Sheng-Li Road, Tainan 70428, Taiwan

28  
29  
30  
31 13

32  
33 14 **Acknowledgements** The study is based in part on data from the National Health Insurance  
34  
35 15 Research Database provided by the Bureau of National Health Insurance, Department of  
36  
37 16 Health and managed by National Health Research Institutes. The interpretation and  
38  
39 17 conclusions contained herein do not represent those of the Bureau of National Health  
40  
41 18 Insurance, Department of Health or National Health Research Institutes. This research was  
42  
43 19 supported by Dalin Tzuchi Hospital (Grant Number DTCRD103(2)-E-05). Lu MC, Chiu SY  
44  
45 20 and Guo HR contributed equally to this work.

46  
47  
48 21

49  
50 22 **Contributors** All the authors approved the contents of the submitted article. Conceived and  
51  
52 23 designed the experiments: TTY CSY. Analyzed the data: TTY GHR. Contributed  
53  
54 24 reagents/materials/analysis tools: TTY LNS LMC GHR. Wrote the paper: TTY LH GHR.  
55  
56 25 Final approval of manuscript: TTY LNS LH CSY LMC GHR.

1  
2  
3  
4  
5  
6  
7  
8  
9  
10  
11  
12  
13  
14  
15  
16  
17  
18  
19  
20  
21  
22  
23  
24  
25  
26  
27  
28  
29  
30  
31  
32  
33  
34  
35  
36  
37  
38  
39  
40  
41  
42  
43  
44  
45  
46  
47  
48  
49  
50  
51  
52  
53  
54  
55  
56  
57  
58  
59  
60

1  
2  
3  
4  
5  
6  
7  
8  
9  
10  
11  
12  
13  
14  
15  
16  
17  
18  
19  
20  
21  
22  
23  
24  
25  
26  
27  
28  
29  
30  
31  
32  
33  
34  
35  
36  
37  
38  
39  
40  
41  
42  
43  
44  
45  
46  
47  
48  
49  
50  
51  
52  
53  
54  
55  
56  
57  
58  
59  
60

**Competing interests** None declared.

**Ethics approval** This study was approved by the Research Ethics Committee of Dalin Tzuchi Hospital (No. B10004021-1).

**Data sharing statement** No additional data are available.

**Funding** The researcher received no specific grant form any funding agency in the public, commercial or not-for-profit sectors.

For peer review only

## References

- 1 Rindfleisch JA, Muller D. Diagnosis and management of rheumatoid arthritis. *Am Fam Physician* 2005;72:1037-47.
- 2 Birnbaum H, Pike C, Kaufman R, *et al.* Societal cost of rheumatoid arthritis patients in the US. *Curr Med Res Opin* 2010;26:77-90.
- 3 Lassere MN, Rappo J, Portek IJ, *et al.* How many life years are lost in patients with rheumatoid arthritis? Secular cause-specific and all-cause mortality in rheumatoid arthritis, and their predictors in a long-term Australian cohort study. *Intern Med J* 2013;43:66-72.
- 4 Lévy L, Fautrel B, Barnetche T, *et al.* Incidence and risk of fatal myocardial infarction and stroke events in rheumatoid arthritis patients. A systematic review of the literature. *Clin Exp Rheumatol* 2008;26:673-79.
- 5 Sokka T, Abelson B, Pincus T. Mortality in rheumatoid arthritis: 2008 update. *Clin Exp Rheumatol* 2008;26:S35-61.
- 6 Zha AM, Napoli M, Behrouz R. Prevention of stroke in rheumatoid arthritis. *Curr Neurol Neurosci Rep* 2015;15:1-10.
- 7 Farmer A, Korszun A, Owen MJ, *et al.* Medical disorders in people with recurrent depression. *Br J Psychiatry* 2008;192:351-5.
- 8 Meune C, Touzé E, Trinquart L, *et al.* High risk of clinical cardiovascular events in rheumatoid arthritis: levels of associations of myocardial infarction and stroke through a systematic review and meta-analysis. *Arch Cardiovasc Dis* 2010;103:253-61.
- 9 Lindhardsen J, Ahlehoff O, Gislason GH, *et al.* Risk of atrial fibrillation and stroke in rheumatoid arthritis: Danish nationwide cohort study. *BMJ* 2012;344:e1257.
- 10 Margaretten M, Julian L, Katz P, *et al.* Depression in patients with rheumatoid arthritis: description, causes and mechanisms. *Int J Clin Rheumatol* 2011;6:617-23.
- 11 Ang DC, Choi H, Kroenke K, *et al.* Comorbid depression is an independent risk factor for mortality in patients with rheumatoid arthritis. *J Rheumatol* 2005;32:1013-19.
- 12 Matcham F, Rayner L, Steer S, *et al.* The prevalence of depression in rheumatoid arthritis: a systematic review and meta-analysis. *Rheumatology (Oxford)* 2013;52:2136-48.
- 13 Lu M, Guo HR, Lin MC, *et al.* Bidirectional associations between rheumatoid arthritis and depression: a nationwide longitudinal study. *Sci Rep* 2016;6:20647.
- 14 Joyce AT, Smith P, Khandker R, *et al.* Hidden cost of rheumatoid arthritis (RA): estimating cost of comorbid cardiovascular disease and depression among patients with RA. *J Rheumatol* 2009;36:743-52.

- 1  
2  
3 1 15 Lee HC, Lin HC, Tsai SY. Severely depressed young patients have over five times  
4 2 increased risk for stroke: a 5-year follow-up study. *Biol Psychiatry* 2008;64:912-5.  
5 3 16 Behrouz R. The risk of ischemic stroke in major rheumatic disorders. *J Neuroimmunol*  
6 4 2014;277:1-5.  
7 5 17 Irwin MR, Davis M, Zautra A. Behavioral comorbidities in rheumatoid arthritis: a  
8 6 psychoneuroimmunological perspective. *Psychiatr Times* 2008;25:1.  
9 7 18 van den Oever IA, van Sijl AM, Nurmohamed MT. Management of cardiovascular  
10 8 risk in patients with rheumatoid arthritis: evidence and expert opinion. *Ther Adv*  
11 9 *Musculoskelet Dis* 2013;5:166-81.  
12 10 19 National Health Insurance Research Database, Taiwan.  
13 11 [http://nhird.nhri.org.tw/date\\_cohort.html](http://nhird.nhri.org.tw/date_cohort.html) (accessed 8 May 2015).  
14 12 20 Liu CY, Hung YT, Chuang YL, *et al*. Incorporating development stratification of  
15 13 Taiwan townships into sampling design of large scale health interview survey. *J*  
16 14 *Health Manag* 2006;4:1-22.  
17 15 21 Liou TH, Huang SW, Lin JW, *et al*. Risk of stroke in patients with rheumatism: a  
18 16 nationwide longitudinal population-based study. *Sci Rep* 2014;4: 5110.  
19 17 22 Lakhan SE, Kirchgessner A, Tepper D, *et al*. Matrix metalloproteinases and  
20 18 blood-brain barrier disruption in acute ischemic stroke. *Front Neurol* 2013;4:32.  
21 19 23 Yang Y, Rosenberg GA. Matrix metalloproteinases as therapeutic targets for stroke.  
22 20 *Brain Res* 2015;1623:30-8.  
23 21 24 Muscatello MR, Bruno A, Scimeca G, Pandolfo G, Zoccali RA. Role of negative  
24 22 affects in pathophysiology and clinical expression of irritable bowel syndrome. *World*  
25 23 *J Gastroenterol* 2014;20:7570-86.  
26 24 25 D'Mello C, Swain MG. Immune-to-brain communication pathways in  
27 25 inflammation-associated sickness and depression. *Curr Top Behav Neurosci* 2016  
28 26 [Epub ahead of print]  
29 27 26 Sleath B, Chewing B, de Vellis BM, *et al*. Communication about depression during  
30 28 rheumatoid arthritis patient visits. *Arthritis Rheum* 2008;59:186-91.  
31 29 27 Appelros P, Stegmayr B, Terént A. Sex differences in stroke epidemiology: a  
32 30 systematic review. *Stroke* 2009;40:1082-90.  
33 31 28 Stroebele N, Müller-Riemenschneider F, Nolte CH, *et al*. Knowledge of risk factors,  
34 32 and warning signs of stroke: a systematic review from a gender perspective. *Int J*  
35 33 *Stroke* 2011;6:60-6.  
36 34 29 Liu R, Yang SH. Window of opportunity: estrogen as a treatment for ischemic stroke.  
37 35 *Brain Res* 2013;1514:83-90.  
38 36 30 Etgen AM, Jover-Mengual T, Zukin RS. Neuroprotective actions of estradiol and  
39 37 novel estrogen analogs in ischemia: translational implications. *Front Neuroendocrinol*  
40 38 2011;32:336-52.

1  
2  
3 1 31 Ai M, Otokozawa S, Asztalos BF, *et al.* Small dense LDL cholesterol and coronary  
4 2 heart disease: results from the Framingham offspring study. *Clin Chem*  
5 3 2010;56:967-76.

6 4 32 Liao KP, Solomon DH. Traditional cardiovascular risk factors, inflammation and  
7 5 cardiovascular risk in rheumatoid arthritis. *Rheumatology* 2013;52:45-52.  
8 6  
9 7  
10 8  
11 9  
12 10  
13 11  
14 12  
15 13  
16 14  
17 15  
18 16  
19 17  
20 18  
21 19  
22 20  
23 21  
24 22  
25 23  
26 24  
27 25  
28 26  
29  
30  
31  
32  
33  
34  
35  
36  
37  
38  
39  
40  
41  
42  
43  
44  
45  
46  
47  
48  
49  
50  
51  
52  
53  
54  
55  
56  
57  
58  
59  
60

1 **Table 1 Demographic data and comorbidity comparison of the study subjects.**

| Variables                                                            | Non-RA cohort<br>N = 32600 (%)   | RA cohort<br>N = 8045(%)         | P      |
|----------------------------------------------------------------------|----------------------------------|----------------------------------|--------|
| Age (years)                                                          |                                  |                                  | 0.85   |
| ≤40                                                                  | 5378(16.5)                       | 1331(16.5)                       |        |
| 41-60                                                                | 15569(47.8)                      | 3814(47.4)                       |        |
| 60 <sup>+</sup>                                                      | 11653(35.7)                      | 2900(36.0)                       |        |
| Mean ± Standard Deviation (SD)                                       | 55.00±14.63                      | 55.01±14.65                      | 0.94   |
| Gender                                                               |                                  |                                  | 0.95   |
| Female                                                               | 22461(68.9)                      | 5540(68.9)                       |        |
| Male                                                                 | 10139(31.1)                      | 2505(31.1)                       |        |
| Monthly income                                                       |                                  |                                  | <0.001 |
| Low                                                                  | 15218(46.7)                      | 3513(43.7)                       |        |
| Median                                                               | 15985(49.0)                      | 4213(52.4)                       |        |
| High                                                                 | 1397(4.3)                        | 319(4.0)                         |        |
| Level of urbanization                                                |                                  |                                  | <0.001 |
| Urban                                                                | 18839(57.8)                      | 4485(55.7)                       |        |
| Suburban                                                             | 5311(16.3)                       | 1258(15.6)                       |        |
| Rural                                                                | 8450(25.9)                       | 2302(28.6)                       |        |
| Comorbidity                                                          |                                  |                                  |        |
| Hypertension                                                         | 5965(21.2)                       | 2216(27.6)                       | <0.001 |
| Diabetes                                                             | 2717(9.6)                        | 1046(13.0)                       | <0.001 |
| Heart disease                                                        | 3054(10.8)                       | 1273(15.8)                       | <0.001 |
| Chronic kidney disease                                               | 264(0.9)                         | 123(1.5)                         | <0.001 |
| Cancer                                                               | 959(3.4)                         | 268(3.3)                         | 0.75   |
| Alcohol dependence syndrome                                          | 30(0.1)                          | 18(0.2)                          | 0.002  |
| Tobacco use                                                          | 36(0.1)                          | 10(0.1)                          | 0.74   |
| Visits seeking medical care                                          |                                  |                                  |        |
| Mean ± SD (median, 25 <sup>th</sup> -75 <sup>th</sup><br>percentile) | 234.55 ± 194.08<br>(185, 97-319) | 159.90 ± 155.87<br>(114, 52-219) | <0.001 |

2

3

4

5

6

7

8

9

**Table 2 Crude and adjusted HRs of stroke for those with RA and comorbid depression, those with RA only, those with depression only as compared to those with neither RA nor depression.**

| Patient group                        | Event | PY        | Incidence | Crude HRs (95% CI) | Adjusted HRs * (95% CI) |
|--------------------------------------|-------|-----------|-----------|--------------------|-------------------------|
| <b>Non-RA cohort</b>                 |       |           |           |                    |                         |
| Neither RA nor depression (n=29,925) | 3063  | 245086.81 | 12.50     | 1.00               | 1.00                    |
| Depression only (n=2,675)            | 377   | 24540.32  | 15.36     | 1.23 (1.11-1.37)   | 1.57 (1.41-1.75)        |
| <b>RA cohort</b>                     |       |           |           |                    |                         |
| RA only (n=6,909)                    | 929   | 55223.83  | 16.82     | 1.35 (1.25-1.45)   | 1.43 (1.12-1.55)        |
| RA and depression (n=1,136)          | 181   | 9901.31   | 18.28     | 1.48 (1.26-1.71)   | 2.18 (1.87-2.54)        |

per 1,000 person-years for incidence rate.

\*Adjusted for age, gender, level of urbanization, income, visits seeking medical care, and comorbidity



1  
2  
3  
4 1  
5  
6 2 **Table 3 Multivariate analysis of factors for the incidence of stroke among patients with**  
7  
8 3 **RA.**

| Variables                   | Cox regression model (n=8045) |           |
|-----------------------------|-------------------------------|-----------|
|                             | Adjusted HRs*                 | 95% CI    |
| Depression                  |                               |           |
| No                          | 1                             |           |
| Yes                         | 1.63                          | 1.37-1.92 |
| Age                         | 1.05                          | 1.03-1.08 |
| Gender                      |                               |           |
| Female                      | 1                             |           |
| Male                        | 1.17                          | 1.03-1.28 |
| Monthly income              |                               |           |
| Low                         | 1                             |           |
| Median                      | 0.97                          | 0.85-1.10 |
| High                        | 0.85                          | 0.58-1.26 |
| Level of urbanization       |                               |           |
| Urban                       | 1                             |           |
| Suburban                    | 1.10                          | 0.92-1.30 |
| Rural                       | 1.06                          | 0.92-1.22 |
| Comorbidity                 |                               |           |
| Hypertension                |                               |           |
| No                          | 1                             |           |
| Yes                         | 1.51                          | 1.40-1.84 |
| Diabetes                    |                               |           |
| No                          | 1                             |           |
| Yes                         | 1.34                          | 1.16-1.56 |
| Heart disease               |                               |           |
| No                          | 1                             |           |
| Yes                         | 1.48                          | 1.31-1.73 |
| Chronic kidney disease      |                               |           |
| No                          | 1                             |           |
| Yes                         | 1.02                          | 0.76-1.30 |
| Cancer                      |                               |           |
| No                          | 1                             |           |
| Yes                         | 1.12                          | 0.84-1.47 |
| Visits seeking medical care | 0.99                          | 0.98-1.01 |

4 Adjusted for all variables in the model.

5

6

STROBE Statement—Checklist of items that should be included in reports of *cohort studies*

|                              | Item No | Recommendation                                                                                                                                                                                                                                                                                                                                                                                                |                               |
|------------------------------|---------|---------------------------------------------------------------------------------------------------------------------------------------------------------------------------------------------------------------------------------------------------------------------------------------------------------------------------------------------------------------------------------------------------------------|-------------------------------|
| <b>Title and abstract</b>    | 1       | (a) Indicate the study's design with a commonly used term in the title or the abstract<br>(b) Provide in the abstract an informative and balanced summary of what was done and what was found                                                                                                                                                                                                                 | P3<br>P3-P4                   |
| <b>Introduction</b>          |         |                                                                                                                                                                                                                                                                                                                                                                                                               |                               |
| Background/rationale         | 2       | Explain the scientific background and rationale for the investigation being reported                                                                                                                                                                                                                                                                                                                          | P5-P6                         |
| Objectives                   | 3       | State specific objectives, including any prespecified hypotheses                                                                                                                                                                                                                                                                                                                                              | P6                            |
| <b>Methods</b>               |         |                                                                                                                                                                                                                                                                                                                                                                                                               |                               |
| Study design                 | 4       | Present key elements of study design early in the paper                                                                                                                                                                                                                                                                                                                                                       | P6                            |
| Setting                      | 5       | Describe the setting, locations, and relevant dates, including periods of recruitment, exposure, follow-up, and data collection                                                                                                                                                                                                                                                                               | P7-P8                         |
| Participants                 | 6       | (a) Give the eligibility criteria, and the sources and methods of selection of participants. Describe methods of follow-up<br>(b) For matched studies, give matching criteria and number of exposed and unexposed                                                                                                                                                                                             | P7-P8<br>P7-P8                |
| Variables                    | 7       | Clearly define all outcomes, exposures, predictors, potential confounders, and effect modifiers. Give diagnostic criteria, if applicable                                                                                                                                                                                                                                                                      | P8-P9                         |
| Data sources/<br>measurement | 8*      | For each variable of interest, give sources of data and details of methods of assessment (measurement). Describe comparability of assessment methods if there is more than one group                                                                                                                                                                                                                          | P6-P9                         |
| Bias                         | 9       | Describe any efforts to address potential sources of bias                                                                                                                                                                                                                                                                                                                                                     | P9                            |
| Study size                   | 10      | Explain how the study size was arrived at                                                                                                                                                                                                                                                                                                                                                                     | P7                            |
| Quantitative variables       | 11      | Explain how quantitative variables were handled in the analyses. If applicable, describe which groupings were chosen and why                                                                                                                                                                                                                                                                                  | P9                            |
| Statistical methods          | 12      | (a) Describe all statistical methods, including those used to control for confounding<br>(b) Describe any methods used to examine subgroups and interactions<br>(c) Explain how missing data were addressed<br>(d) If applicable, explain how loss to follow-up was addressed<br>(e) Describe any sensitivity analyses                                                                                        | P8-P9<br>P9<br>NA<br>P9<br>P9 |
| <b>Results</b>               |         |                                                                                                                                                                                                                                                                                                                                                                                                               |                               |
| Participants                 | 13*     | (a) Report numbers of individuals at each stage of study—eg numbers potentially eligible, examined for eligibility, confirmed eligible, included in the study, completing follow-up, and analysed<br>(b) Give reasons for non-participation at each stage<br>(c) Consider use of a flow diagram                                                                                                               | P9-P10<br>NA<br>NA            |
| Descriptive data             | 14*     | (a) Give characteristics of study participants (eg demographic, clinical, social) and information on exposures and potential confounders<br>(b) Indicate number of participants with missing data for each variable of interest<br>(c) Summarise follow-up time (eg, average and total amount)                                                                                                                | P9-P10<br>NA<br>P10           |
| Outcome data                 | 15*     | Report numbers of outcome events or summary measures over time                                                                                                                                                                                                                                                                                                                                                | P10                           |
| Main results                 | 16      | (a) Give unadjusted estimates and, if applicable, confounder-adjusted estimates and their precision (eg, 95% confidence interval). Make clear which confounders were adjusted for and why they were included<br>(b) Report category boundaries when continuous variables were categorized<br>(c) If relevant, consider translating estimates of relative risk into absolute risk for a meaningful time period | P10, P22<br>P21<br>NA         |

|    |                          |    |                                                                                        |         |
|----|--------------------------|----|----------------------------------------------------------------------------------------|---------|
| 1  |                          |    |                                                                                        |         |
| 2  | Other analyses           | 17 | Report other analyses done—eg analyses of subgroups and interactions, and              |         |
| 3  |                          |    | sensitivity analyses                                                                   | P10     |
| 4  |                          |    |                                                                                        |         |
| 5  | <b>Discussion</b>        |    |                                                                                        |         |
| 6  | Key results              | 18 | Summarise key results with reference to study objectives                               | P11     |
| 7  | Limitations              | 19 | Discuss limitations of the study, taking into account sources of potential bias or     | P14-P15 |
| 8  |                          |    | imprecision. Discuss both direction and magnitude of any potential bias                |         |
| 9  |                          |    |                                                                                        |         |
| 10 | Interpretation           | 20 | Give a cautious overall interpretation of results considering objectives, limitations, | P14-P15 |
| 11 |                          |    | multiplicity of analyses, results from similar studies, and other relevant evidence    |         |
| 12 | Generalisability         | 21 | Discuss the generalisability (external validity) of the study results                  | P15     |
| 13 |                          |    |                                                                                        |         |
| 14 | <b>Other information</b> |    |                                                                                        |         |
| 15 | Funding                  | 22 | Give the source of funding and the role of the funders for the present study and, if   | P17     |
| 16 |                          |    | applicable, for the original study on which the present article is based               |         |
| 17 |                          |    |                                                                                        |         |

18  
19 \*Give information separately for exposed and unexposed groups.

20  
21 **Note:** An Explanation and Elaboration article discusses each checklist item and gives methodological background and  
22 published examples of transparent reporting. The STROBE checklist is best used in conjunction with this article (freely  
23 available on the Web sites of PLoS Medicine at <http://www.plosmedicine.org/>, Annals of Internal Medicine at  
24 <http://www.annals.org/>, and Epidemiology at <http://www.epidem.com/>). Information on the STROBE Initiative is  
25 available at <http://www.strobe-statement.org>.  
26  
27  
28  
29  
30  
31  
32  
33  
34  
35  
36  
37  
38  
39  
40  
41  
42  
43  
44  
45  
46  
47  
48  
49  
50  
51  
52  
53  
54  
55  
56  
57  
58  
59  
60
